1 **Remote immune processes revealed by immune-derived circulating cell-free DNA**

2

3 Ilana Fox-Fisher<sup>1</sup>, Sheina Piyanzin<sup>1</sup>, Bracha-Lea Ochana<sup>1</sup>, Agnes Klochendler<sup>1</sup>, Judith Magenheim<sup>1</sup>,  
4 Ayelet Peretz<sup>1</sup>, Netanel Loyfer<sup>2</sup>, Joshua Moss<sup>1</sup>, Daniel Cohen<sup>1</sup>, Yaron Drori<sup>3</sup>, Nehemya Friedman<sup>3</sup>,  
5 Michal Mandelboim<sup>3</sup>, Marc E. Rothenberg<sup>4</sup>, Julie M. Caldwell<sup>4</sup>, Mark Rochman<sup>4</sup> Arash Jamshidi<sup>5</sup>,  
6 Gordon Cann<sup>5</sup>, David Lavi<sup>6</sup>, Tommy Kaplan<sup>2</sup>, Benjamin Glaser<sup>7</sup>, Ruth Shemer<sup>1</sup>, Yuval Dor<sup>1,\*</sup>

7

8 <sup>1</sup>Department of Developmental Biology and Cancer Research, The Institute for Medical Research  
9 Israel-Canada, The Hebrew University-Hadassah Medical School, Jerusalem, Israel

10

11 <sup>2</sup>School of Computer Science and Engineering, The Hebrew University of Jerusalem, Jerusalem, Israel

12 <sup>3</sup>Department of Epidemiology and Preventive Medicine, School of Public Health, Sackler Faculty of  
13 Medicine, Tel-Aviv University, Tel-Aviv, Israel, and Central Virology Laboratory, Ministry of Health,  
14 Chaim Sheba Medical Center, Tel-Hashomer, Ramat-Gan, Israel

15 <sup>4</sup>Division of Allergy and Immunology, Department of Pediatrics, Cincinnati Children's Hospital  
16 Medical Center, University of Cincinnati, Cincinnati, Ohio 45229.

17 <sup>5</sup>GRAIL, Menlo Park, CA 94402, USA

18 <sup>6</sup>Department of Hematology, Hadassah Hebrew University Medical Center, Jerusalem, Israel

19 <sup>7</sup>Endocrinology and Metabolism Service, Hadassah-Hebrew University Medical Center, Jerusalem,  
20 Israel

21 \* Correspondence: Yuval Dor, email [yuvald@ekmd.huji.ac.il](mailto:yuvald@ekmd.huji.ac.il)

22 **Short title:** Immune cell turnover monitored by cell-free DNA

23 **Abstract**

24 Blood cell counts often fail to report on immune processes occurring in remote tissues. Here we use  
25 immune cell type-specific methylation patterns in circulating cell-free DNA (cfDNA) for studying  
26 human immune cell dynamics. We characterized cfDNA released from specific immune cell types in  
27 healthy individuals (N=242), cross sectionally and longitudinally. Immune cfDNA levels had no  
28 individual steady state as opposed to blood cell counts, suggesting that cfDNA concentration reflects  
29 adjustment of cell survival to maintain homeostatic cell numbers. We also observed selective elevation  
30 of immune-derived cfDNA upon perturbations of immune homeostasis. Following influenza  
31 vaccination (N=92), B-cell-derived cfDNA levels increased prior to elevated B-cell counts and  
32 predicted efficacy of antibody production. Patients with Eosinophilic Esophagitis (N=21) and B-cell  
33 lymphoma (N=27) showed selective elevation of eosinophil and B-cell cfDNA respectively, which  
34 were undetectable by cell counts in blood. Immune-derived cfDNA provides a novel biomarker for  
35 monitoring immune responses to physiological and pathological processes that are not accessible using  
36 conventional methods.

37

38

39

## 40 INTRODUCTION

41 Circulating biomarkers for monitoring inflammatory or immune responses are an essential part of  
42 diagnostic medicine and an important tool for studying physiologic and pathologic processes. These  
43 include, among others, counts of specific immune cell types in peripheral blood, RNA expression  
44 profiles in blood cells(Maas et al., 2002; Tuller et al., 2013), and levels of circulating proteins such as  
45 CRP(Gabay and Kushner, 1999; Sproston and Ashworth, 2018). A major limitation of circulating  
46 immune cell analysis is that it often fails to report on immune processes taking place in remote  
47 locations. Conversely, CRP and similar proteins do reflect the presence of tissue inflammation but are  
48 highly non-specific with regard to tissue location and the nature of inflammatory process(Gabay and  
49 Kushner, 1999).

50 Dying cells release nucleosome-size fragments of cell-free DNA (cfDNA), which travel transiently in  
51 blood before being cleared by the liver(Heitzer et al., 2019). Analysis of the sequence of such  
52 fragments is emerging as a powerful diagnostic modality. Liquid biopsies using cfDNA have been  
53 applied to reveal the presence of mutations in a fetus as reflected in maternal cfDNA(Bianchi et al.,  
54 2014; Christina Fan et al., 2012; Lo et al., 1997), identify and monitor tumor dynamics via the presence  
55 of somatic mutations in plasma(Wan et al., 2017), and detect the rejection of transplanted organs when  
56 the levels of donor-derived DNA markers are elevated in recipient plasma(De Vlaminck et al., 2015,  
57 2014). More recently, we and others have shown that tissue-specific DNA methylation patterns can be  
58 used to determine the tissue origins of cfDNA, allowing to infer cell death dynamics in health and  
59 disease even when no genetic differences exist between the host and the tissue of interest(Cheng et al.,  
60 2019; Lehmann-Werman et al., 2016)

61 Although the majority of cfDNA in healthy individuals is known to originate in hematopoietic  
62 cells(Lehmann-Werman et al., 2016; Moss et al., 2018b; Sun et al., 2015), it has often been regarded  
63 as background noise, against which one may look for rare cfDNA molecules released from a solid  
64 tissue of interest. We hypothesized that identification of immune cell-derived cfDNA could open a

65 window into immune and inflammatory cell dynamics, even in cases where peripheral blood counts  
66 are not informative. Here we describe the development of a panel of immune cell type-specific DNA  
67 methylation markers, and the use of this panel for cfDNA-based assessment of human immune cell  
68 turnover in health and disease. We show that immune cell cfDNA measurement can provide clinical  
69 biomarkers in multiple disease and treatment conditions, otherwise undetectable by cell subset  
70 enumeration in blood.

71

## 72 **RESULTS**

73

### 74 **Identification of cell type-specific DNA methylation markers for immune cells**

75 Using a reference methylome atlas of 32 primary human tissues and sorted cell types (Moss et al.,  
76 2018b), we searched for CpG sites that are hypomethylated in a specific immune-cell type and  
77 hypermethylated elsewhere. Consistent with the fundamental role of DNA methylation as a  
78 determinant of cell identity, we identified dozens of uniquely hypomethylated CpG sites for most cell  
79 types examined, qualifying these as biomarkers for DNA derived from a given cell type (**Figure 1A**).  
80 Based on this *in silico* comparative analysis, we selected for further work 17 different CpG sites, whose  
81 combined methylation status could distinguish the DNA of 7 major immune cell types: neutrophils,  
82 eosinophils, monocytes, B-cells, CD3 T-cells, CD8 cytotoxic T-cells, and regulatory T-cells (Tregs).  
83 For each marker CpG we designed PCR primers to amplify a fragment of up to 160bp flanking it,  
84 considering the typical nucleosome size of cfDNA molecules. Amplicons included additional adjacent  
85 CpG sites, to gain enhanced cell type specificity due to the regional nature of tissue-specific DNA  
86 methylation (Lehmann-Werman et al., 2016). We then established a multiplex PCR protocol, to co-  
87 amplify all 17 markers from bisulfite-treated DNA followed by next generation sequencing for  
88 assessment of methylation patterns (Neiman et al., 2020). Methylation patterns of amplified loci across  
89 18 different human tissues validated the patterns inferred from *in silico* analysis and supported the

90 ability of this marker cocktail to specifically identify the presence of DNA from each of the seven  
 91 immune cell types (**Figure 1B**). We also assessed assay sensitivity and accuracy via spike-in  
 92 experiments. We mixed human leukocyte DNA with DNA from the HEK-293 human embryonic  
 93 kidney cell line and used the methylation cocktail to assess the fraction of each immune cell type. The  
 94 markers quantitatively detected the presence of DNA from specific immune cell types even when blood  
 95 DNA was diluted 10-20 fold (**Figure 1C and Supplementary Figure S1**). These findings establish  
 96 specificity, sensitivity and accuracy of the methylation marker cocktail for detection of DNA derived  
 97 from the 7 selected immune cell types.

98

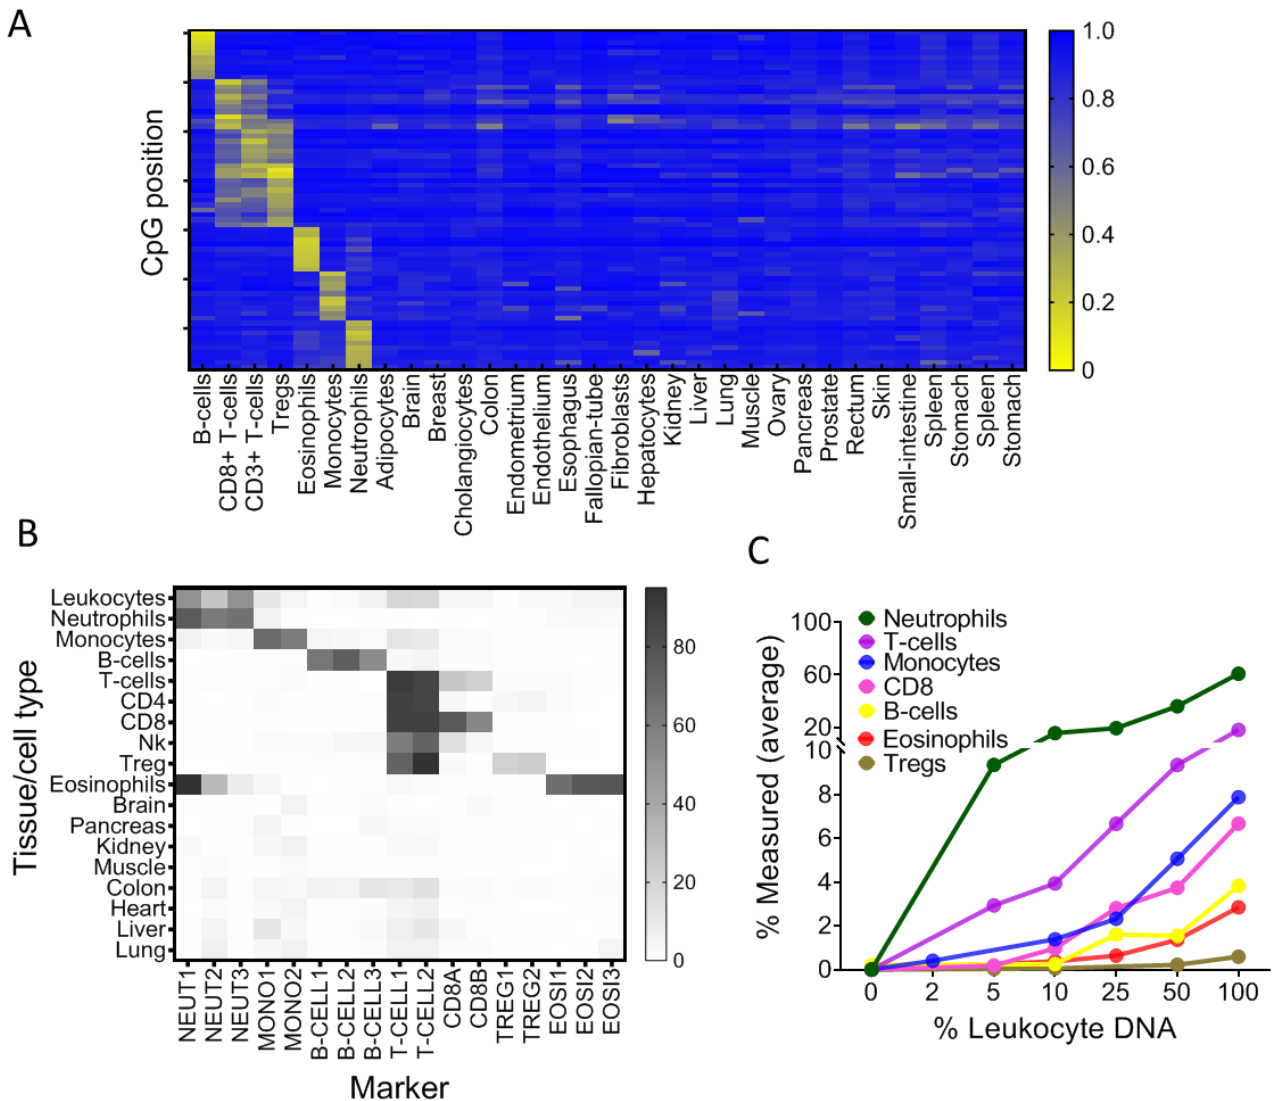

**Figure 1: Identification of specific immune cell DNA methylation markers.**

**A**, Methylation atlas, based on Illumina 450K arrays, composed of 32 tissues and sorted cells (columns). For each immune cell type we chose the top 10 CpGs that are hypomethylated (yellow) in the specific immune cell type and hypermethylated (blue) in other tissues and cells. This yielded 70 cell specific CpG sites (rows) for 7 different immune-cell subtypes– B-cells, CD8 cytotoxic T-cells, CD3 T-cells, regulatory T-cells, eosinophils, monocytes and neutrophils. **B**, methylation patterns of 17 loci, selected from the 70 shown in panel A, based on the presence of multiple adjacent hypomethylated CpGs within an amplicon of up to 160bp. Each methylation marker (columns) was assessed using genomic DNA from 18 different tissues and cell types (rows). All 17 markers were amplified in one multiplex PCR reaction. **C**, Spike-in experiments assessing assay sensitivity. Human leukocyte DNA was mixed with DNA from HEK-293 cells (human embryonic kidney cells) in the indicated proportions. Colored lines show the inferred proportion of DNA from each immune cell type using markers specific to neutrophils (NEUT1, NEUT2, NEUT3), monocytes (MONO1, MONO2), eosinophils (EOSI2, EOSI3), B-cells (B-CELL1, B-CELL2, B-CELL3), CD3-T-cells (T-CELL1, T-CELL2), CD8 cytotoxic T cells (CD8A, CD8B), and regulatory T cells (TREG1, TREG2).

99

100 **Immune cfDNA reflects cell turnover rather than counts of circulating blood cells**

101 To validate assay accuracy, we applied the immune cell methylation markers to genomic DNA of  
102 blood cells, expecting to observe signals that agree with cell ratios as determined by Complete Blood  
103 Counts (CBC). We obtained 392 blood samples from 79 healthy individuals at different time points,  
104 and simultaneously tested for CBC, and methylation marker cocktail both in DNA extracted from  
105 whole blood as well as in cfDNA extracted from plasma. Theoretically, immune-cell cfDNA could be  
106 a mere reflection of the counts of each cell type (for example, if it is released mostly from blood cells  
107 that have died during blood draw or preparation of plasma). In such a case, immune cfDNA should  
108 correlate well with CBC (and with immune methylation markers measured in genomic DNA from  
109 whole blood). Alternatively, if cfDNA reflects cell death events that took place *in vivo*, the correlation  
110 to cell counts is expected to be weaker.

111 Comparing the CBC to DNA methylation pattern, we observed a strong correlation between  
112 assessments of specific cell fractions in the two methods (Pearson's correlations;  $r=0.67-0.83$ ,  $P$ -  
113 value $<0.0001$ , **Figure 2A and Supplementary Figure S2**), supporting validity of the methylation  
114 assay for identifying fractions of DNA derived from specific immune cell types, consistent with

115 previous findings(Baron et al., 2018). However, comparison of cfDNA methylation markers in plasma  
116 to blood DNA methylation markers and CBC, we observed that proportion of cfDNA from specific  
117 immune cell types did not correlate with the proportion of the same markers in circulating blood cells  
118 and with CBC (Pearson's correlations;  $r=0.14-0.53$ , **Figure 2B-C and Supplementary Figure S2**).  
119 These findings suggest that immune cfDNA levels are the result of biological processes beyond  
120 immune cell counts.

121 We reasoned that over- or under-representation of DNA fragments from a specific immune cell type  
122 in plasma compared with blood counts most likely result from differences in cell turnover. The  
123 concentration of cfDNA from a given cell type should be a function of the total number of cells that  
124 have died per unit time (turnover rate), which is derived from the number of cells and their lifespan:

$$125 \quad \frac{\textit{Total cell number}}{\textit{Life span}} = \textit{Turnover rate}$$

126 The larger the population of a given cell type (both circulating and tissue-resident), the more cfDNA  
127 it will release; similarly, the shorter is lifespan, the more DNA will be released to plasma. The cfDNA  
128 findings were consistent with this model. For example, the fraction of lymphocyte cfDNA in plasma  
129 was always smaller than the fraction of lymphocyte DNA in circulating blood cells or the fraction of  
130 lymphocytes in CBC (**Figure 2B-C and Supplementary Figure S2**), in agreement with the long half-  
131 life of lymphocytes compared with other blood cell types(Macallan et al., 2005; Michie et al., 1992).  
132 Conversely, the fraction of monocyte cfDNA was larger than the fraction of monocyte DNA in  
133 genomic DNA from whole blood or the fraction of monocytes in CBC (**Figure 2B-C**), consistent with  
134 the shorter half-life of monocytes(Patel et al., 2017).

135 To further examine the relative presence of immune cfDNA in plasma and whole blood, we employed  
136 an independent set of samples and an independent technology to measure and interpret methylation  
137 markers. Specifically, we performed deconvolution(Moss et al., 2018b) of methylomes obtained by  
138 whole genome bisulfite sequencing (30x coverage), on genomic DNA from whole blood, and matched

139 plasma cfDNA from 23 healthy donors (see Methods). This analysis, based on genome-wide  
140 methylation patterns, also revealed that lymphocyte and monocyte cfDNA was under- and over-  
141 represented, respectively, relative to the abundance of DNA from these cells in blood (lymphocytes,  
142 p-value=0.002; monocytes, p-value=0.0005, Kruskal-Wallis) (**Figure 2D**).

143 These findings support the exciting idea that cfDNA levels from a given immune cell type integrate  
144 total cell number and the lifespan of that cell type, and can provide information on processes not  
145 evident from circulating cell counts. For example, if the level of cfDNA from a specific immune cell  
146 type increases while the circulating counts of this cell type are unchanged, this can indicate either  
147 growth in the size of a tissue-resident population, or increased cell turnover, both of which are  
148 important immune parameters that cannot be easily obtained otherwise. Below we provide evidence  
149 that such information can be extracted following perturbations of immune homeostasis.

#### 150 151 **Estimation of immune cfDNA baseline in healthy individuals**

152 To define the baseline levels of immune-derived cfDNA in healthy individuals, we collected and tested  
153 plasma samples from 227 healthy donors (males and females, ages 1-85 years). Consistent with our  
154 previous plasma methylome analysis (Moss et al., 2018a), we found that neutrophils were the main  
155 source of immune-derived cfDNA (Mean=390, range 10-1064 genome equivalents [GE] /ml),  
156 followed by monocytes (Mean=101, range 6-233 GE/ml), eosinophils (Mean=38, range 0-111 GE /ml)  
157 and lymphocytes (T cells, Mean=30, range 1-79; B cells, Mean=17, range 3-42; CD8 T-cells,  
158 Mean=8, range 0-27; Tregs, Mean=2, range 0-9 GE/ml) (**Supplemental Figure S3**). These data chart  
159 the normal range of cfDNA concentrations from specific immune cell types, including age and gender  
160 characteristics, against which pathologic deviations can be identified (see below).

161 We also conducted a longitudinal study, to understand how immune-derived cfDNA is changing over  
162 time in the same individual. We collected weekly blood samples from 15 healthy donors over a period  
163 of 6 weeks. For each sample we obtained CBC and measured immune DNA methylation markers in



164 genomic DNA of blood cells and in plasma cfDNA. We then calculated the coefficient of variation  
165 (CV) among CBC, blood methylation markers and cfDNA methylation markers, within and between  
166 individuals. In circulating blood cells, the inter-individual variation in immune methylation markers  
167 and CBC was always higher than the intra-individual variation in these markers (**Figure 2E and**  
168 **Supplementary Figure S3**). This is consistent with previous reports that blood cell counts among  
169 individuals are more similar to themselves than to others, indicating distinct set-points per person for  
170 the total number of specific immune cell types circulating in blood (Alpert et al., 2019; Carr et al.,  
171 2016). Strikingly, cfDNA values of the same immune methylation markers varied to the same extent  
172 among samples of the same individual and among samples of different individuals (**Figure 2F**). This  
173 argues that unlike cell counts, cfDNA of immune cells has no individual set-point. Rather, cfDNA  
174 levels appear to reflect homeostatic maintenance of cell number, whereby cell birth and death are  
175 modulated to maintain a desired cell count.

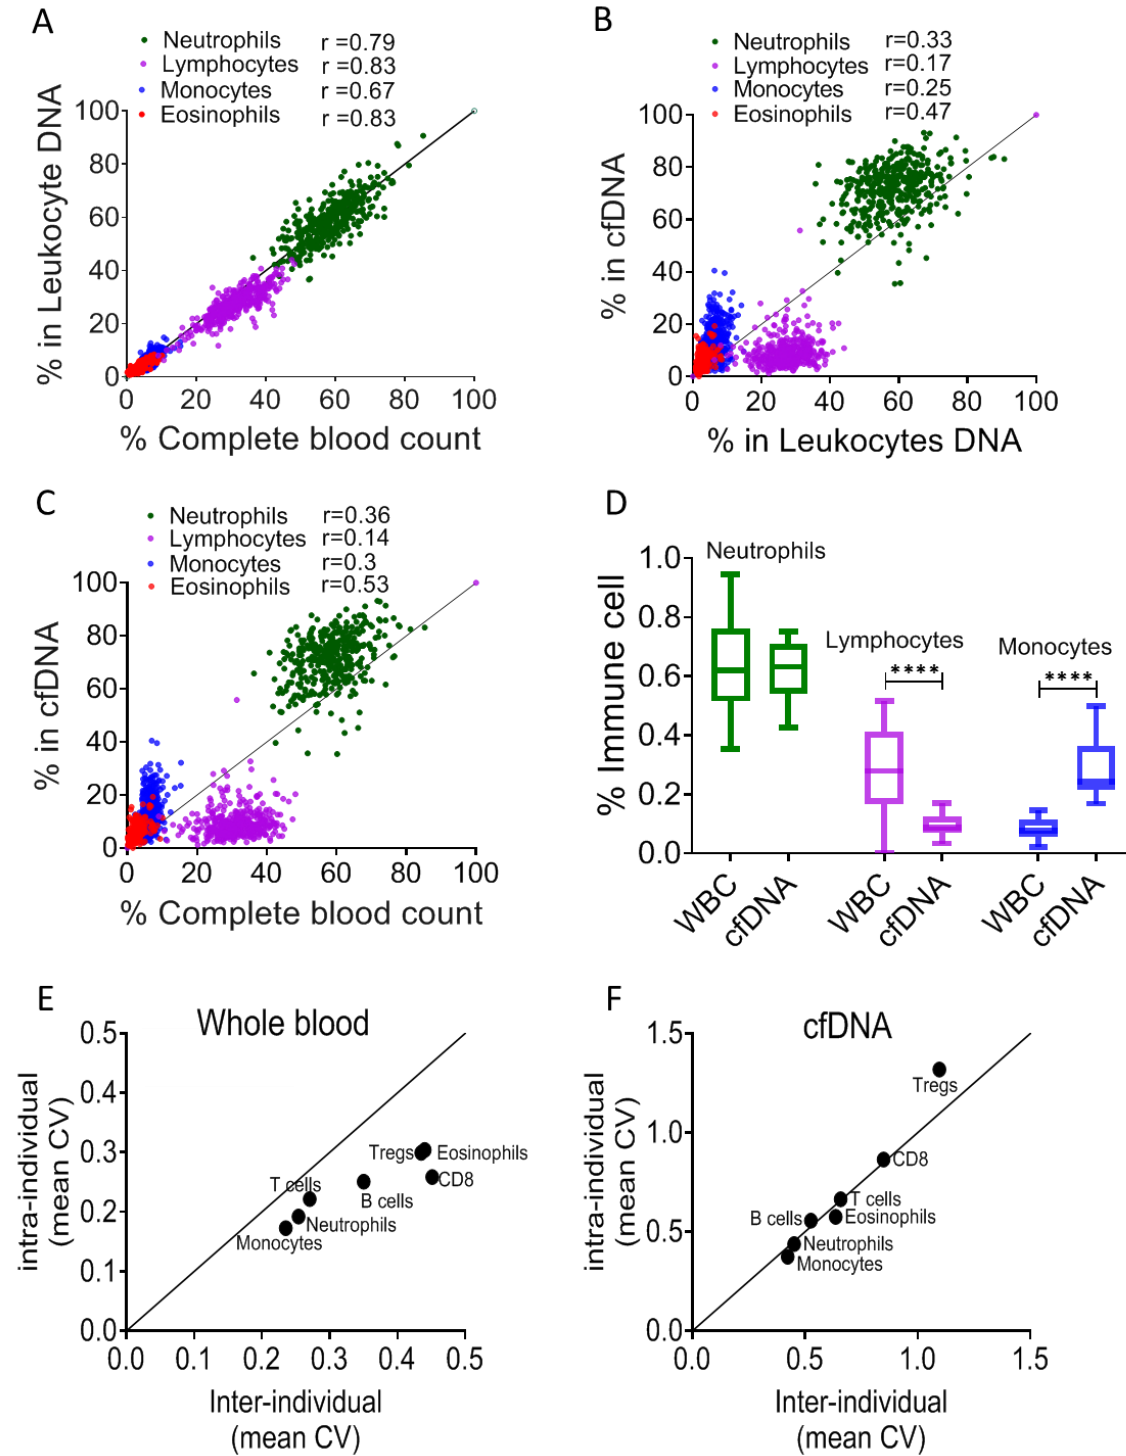

**Figure 2: immune cfDNA methylation markers distribute differently than circulating immune cells and reflect immune cell turnover.**

**A**, levels of immune methylation markers in genomic DNA extracted from whole blood, versus Complete Blood Counts (CBC) from same donors. A total of 392 plasma and blood samples were obtained from 79 healthy donors (47 females, 32 males; age range 20-73). Shown are Pearson's correlations; P-value<0.0001. **B**, cfDNA methylation versus whole blood methylation of the same donors. **C**, cfDNA methylation versus CBC of the same donors. Note that cfDNA proportions of immune cells differ from the proportions of these cell types in peripheral blood. **D**, deconvolution of cfDNA and blood cell (WBC) methylomes generated using whole genome bisulfite sequencing (WGBS) of 23 healthy donors. Note under-representation of lymphocyte DNA and over-representation of monocyte DNA in cfDNA compared with blood DNA (lymphocytes, p-value=0.0021; monocytes, p-value=0.0005, Kruskal-Wallis). **E-F**, XY scatter plots showing the average of inter-individual coefficient of variation (X-axis) and intra-individual coefficient of variation (Y-axis) for each immune cell type in whole blood (**E**) and in cfDNA (**F**) based on methylation markers. Black line represents perfect correlation between inter- and intra-individual dual variation. Dots below the black line reflect greater inter-individual variation and dots that are above reflect greater intra-individual variance. A smaller intra-individual variation in whole blood suggests a setpoint for proportions of blood cell types in each individual. By contrast, cfDNA levels of immune markers vary similarly within and between individuals.

177

178

179 **Elevation of B-cell derived cfDNA after influenza vaccination precedes changes in cell counts**  
180 **and correlates with specific antibody production**

181 We hypothesized that upon perturbations of the immune system, cfDNA markers will reveal  
182 information about immune cell dynamics that is not present in peripheral blood cell counts, for example  
183 extensive cell death during the process of affinity maturation, which repeatedly selects for B cell clones  
184 with increased antibody-target affinity. To test this hypothesis, we examined longitudinal blood  
185 samples from healthy individuals who received an annual quadrivalent influenza vaccination(Nakaya

186 et al., 2011; Voigt et al., 2018). The influenza vaccine response is mediated mostly by the humoral  
187 immune system (B cells) aided by CD4 T-cells(Gage et al., 2018). Changes in circulating cell counts  
188 occur a week after vaccination, reflecting processes such as plasma cell formation (Victora and Wilson,  
189 2015). cfDNA responses to vaccination were not previously reported. We recruited 92 healthy  
190 volunteers (age range 20-73, mean age 37.4) who received the vaccination in 2018 or 2019. From each  
191 volunteer we obtained blood samples a day before vaccination (day zero, D0), and at day 3, 7 and 28  
192 post-vaccination. Consistent with previous reports, B cell counts (measured by methylation analysis  
193 of DNA from whole blood) were moderately but significantly elevated on day 7, and persisted to day  
194 28 (p-value=0.0048, Kruskal-Wallis) (**Figure 3A**)(Li et al., 2012). Surprisingly, B-cell derived cfDNA  
195 levels increased as early as day 3, peaked on day 7 and returned to baseline levels on day 28 (p-  
196 value<0.0001, Kruskal-Wallis) (**Figure 3B,D**), suggesting that cfDNA reveals an early increase in the  
197 turnover of B-cells following vaccination, which is not portrayed in circulating B-cells. We observed  
198 a similar trend in the ratio of B-cell cfDNA to B-cell counts in each individual (**Figure 3C**, p-  
199 value=0.016, Kruskal-Wallis, B-cell counts calculated from methylation markers in whole blood). Of  
200 note, this response was specific to B-cell-derived cfDNA; total cfDNA levels did not change over the  
201 time course of vaccination, nor did cfDNA levels of other immune cell types (**Supplementary Figure**  
202 **4S**). Taken together, this strengthens evidence that cfDNA changes reflect processes beyond alterations  
203 in absolute circulating cell counts in a cell-specific manner.

204 To ask if the elevation of B-cell cfDNA has functional significance in the development of an immune  
205 response, we obtained information on the production of antibodies. We classified all volunteers into  
206 responders or non-responders according to the hemagglutinin antibody titer measured at 28 days post-  
207 vaccination, and asked if B-cell cfDNA or B-cell counts correlated with antibody production.  
208 Strikingly, responders had a higher peak elevation of B-cell cfDNA relative to their pre-vaccination  
209 baseline levels compared with non-responders (p-value=0.044, Mann-Whitney) (**Figure 3E and**  
210 **Supplementary Figure S4**). Peripheral B-cell counts were not different between responders and non-

211 responders (p-value=0.2, Mann-Whitney) (**Figure 3F**). It is well established that influenza vaccination  
212 is more effective in younger individuals(Del Giudice et al., 2015; Ranjeva et al., 2019; Siegrist and  
213 Aspinall, 2009; Wagner et al., 2018). To examine the relationship between age, antibody production  
214 and cfDNA we plotted the fold elevation of B-cell cfDNA from baseline as a function of donor age,  
215 and marked responders and non-responders. Non-responders to vaccination in our cohort were all  
216 above 35 years and tended to have a minimal elevation of B-cell cfDNA above baseline even when  
217 compared to people in their age group (**Figure 3G and Supplementary Figure S4**, peak elevation of  
218 B cell cfDNA in responders vs non-responders p value=0.089), suggesting that B-cell cfDNA  
219 dynamics report on a biological process independent of age. We conclude that B-cell turnover (as  
220 reflected in B-cell cfDNA but not in B-cell counts) captures an early response of the immune system  
221 to influenza vaccination that predicts a functional outcome, suggesting cell-specific cfDNA could  
222 serve as a sensitive biomarker of functional immune changes.

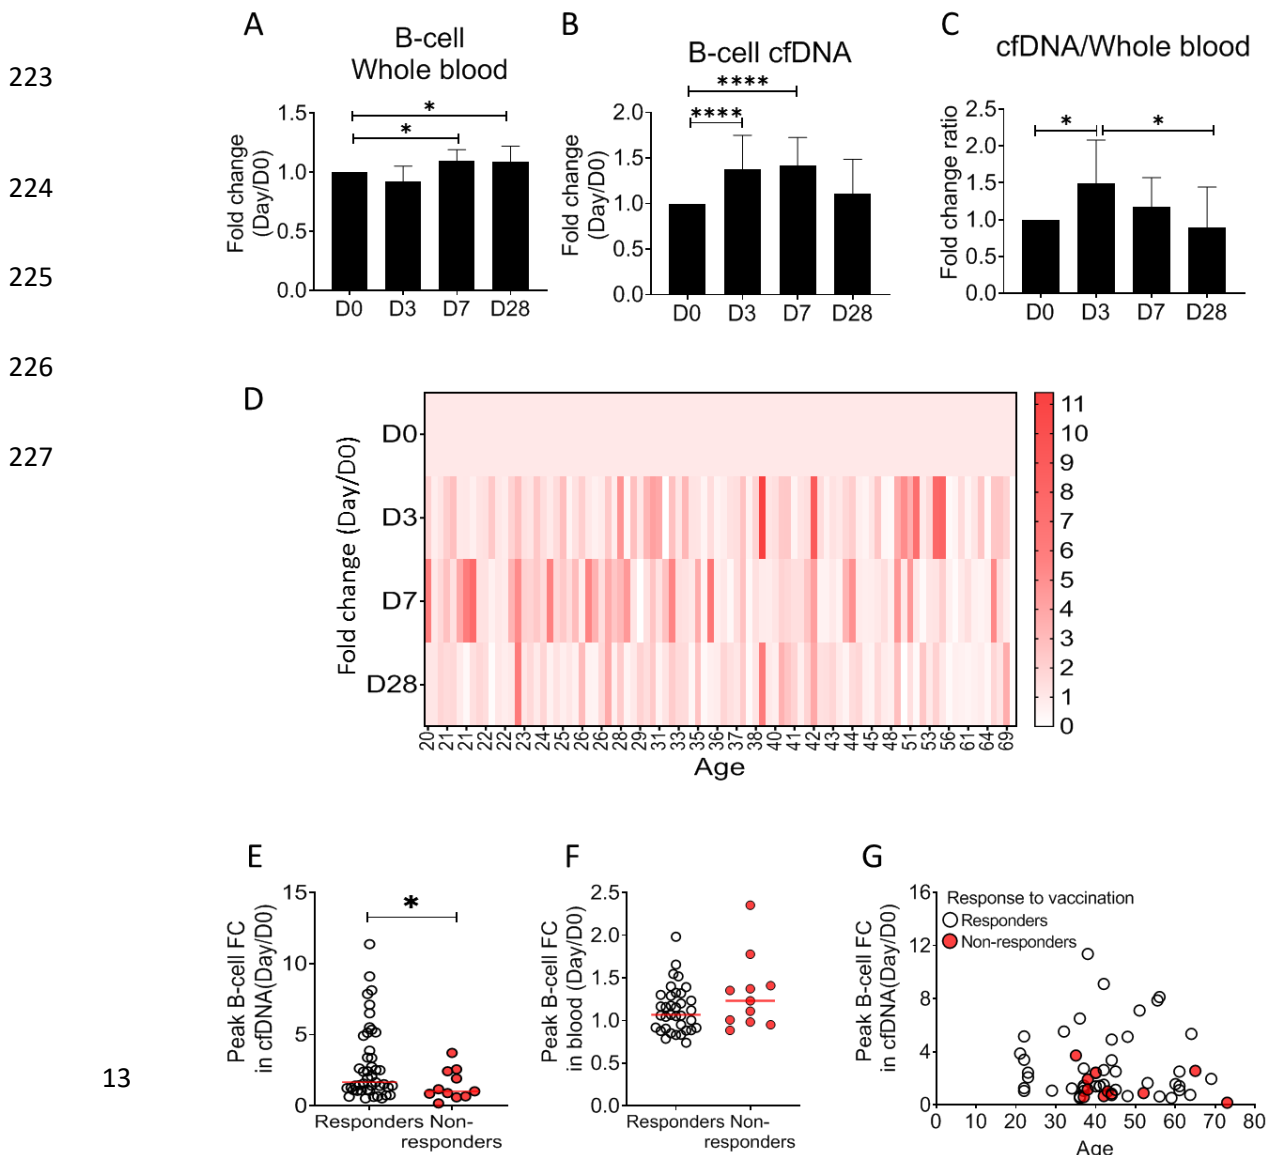

**Figure 3: Elevation of B-cell derived cfDNA after influenza vaccination precedes changes in cell counts and reflects efficacy of response to vaccination.**

Plasma, serum, and blood samples were obtained from 92 healthy donors receiving the influenza vaccination (55 females, 37 males, age range 20-73y). **A**, circulating B-cells, assessed using methylation markers, are elevated on day 7 (p-value=0.03) and 28 (p-value=0.021) compared to baseline (Kruskal-Wallis). **B**, B-cell derived cfDNA markers were normalized to the levels of each individual at baseline (D0) and represented as fold change. B-cell derived cfDNA is elevated compared to baseline on day 3 and day 7 after influenza vaccination (p-value<0.0001, Kruskal-Wallis). **C**, the ratio of B-cell derived cfDNA and B-cells in blood was calculated for each individual. On day 3 the ratio was significantly higher than at baseline (p-value=0.016). Bars indicate the median and error bars indicate the confidence interval. **D**, a heat map showing the change of B-cell derived cfDNA in each individual following vaccination relative to baseline. Donors are ordered by their age. **E**, serum antibody titers were used to divide donors into responders (n=45) who have developed antibodies following vaccination, and non-responders (n=11) who have not. Graph shows the maximal elevation (fold change [FC] from baseline) in B-cell derived cfDNA that was recorded for each donor. (P-value=0.045, Mann-Whitney). **F**, Maximal elevation in B-cell counts in blood based on methylation markers does not differ between responders and non-responders. P-value=0.2, Mann-Whitney test. **G**, XY Scatter plot for peak B-cell cfDNA elevation as a function of age. Non-responders (colored with red) tend to be older and show reduced elevation of B-cell cfDNA.

228

229 **Selective elevation of eosinophil-derived cfDNA in patients with Eosinophilic Esophagitis**

230 To test the hypothesis that immune-derived cfDNA can reveal pathologic inflammatory processes in  
231 remote locations, we studied patients with Eosinophilic Esophagitis (EoE). EoE is a chronic  
232 inflammatory disease characterized clinically by esophageal dysfunction, and histologically by  
233 eosinophil-predominant inflammation of the esophagus(Liacouras et al., 2011). Diagnosis of EoE  
234 requires an invasive endoscopic biopsy. Notably, most patients do not show peripheral  
235 eosinophilia(Aceves et al., 2007; Dellon et al., 2009). We analyzed blindly immune cfDNA markers  
236 in plasma samples from patients with active EoE (N=21), patients with EoE in remission (N=24) and  
237 healthy controls (N=14). Patients with active EoE had elevated levels of Eosinophil cfDNA

238 (Mean=115 GE/ml) compared with both healthy controls (Mean=34 GE/ml, p-value =0.0056) and  
239 patients with inactive EoE (Mean=36 GE/ml, p-value=0.0003, Kruskal-Wallis), while other immune  
240 cfDNA markers were not elevated in active EoE patients (**Figure 4A,B and Supplemental Figure**  
241 **5S**). The fraction of eosinophils in blood was not significantly elevated in EoE patients (**Figure 4C**, p-  
242 value=0.1, Kruskal-Wallis), consistent with restriction of eosinophil abundance to the esophagus and  
243 further supporting the idea that immune cfDNA is not a reflection of circulating immune cells.  
244 Among a small subset of donors for which we had access to plasma, PBMC and CBC (12 active EoE,  
245 8 inactive EoE, 3 controls), elevated eosinophil counts and elevated eosinophil cfDNA levels were  
246 observed in non-overlapping groups of EoE patients (elevated eosinophil counts in 4/12 patients with  
247 active EoE, 2/8 patients with inactive EoE, as previously reported(Dellon et al., 2009); elevated  
248 eosinophil cfDNA in 5/12 patients with active EoE), suggesting that counts and cfDNA reflect  
249 different biological processes (**Figure 4D**). Finally, we tested our ability to distinguish active EoE  
250 patients from healthy individuals, noting high specificity and sensitivity (**Figure 4E**, AUC 0.83, p-  
251 value = 0.001). These findings suggest that cell type-specific cfDNA can be used to detect clinical  
252 inflammation occurring in solid tissues that is not reflected in peripheral cell counts.

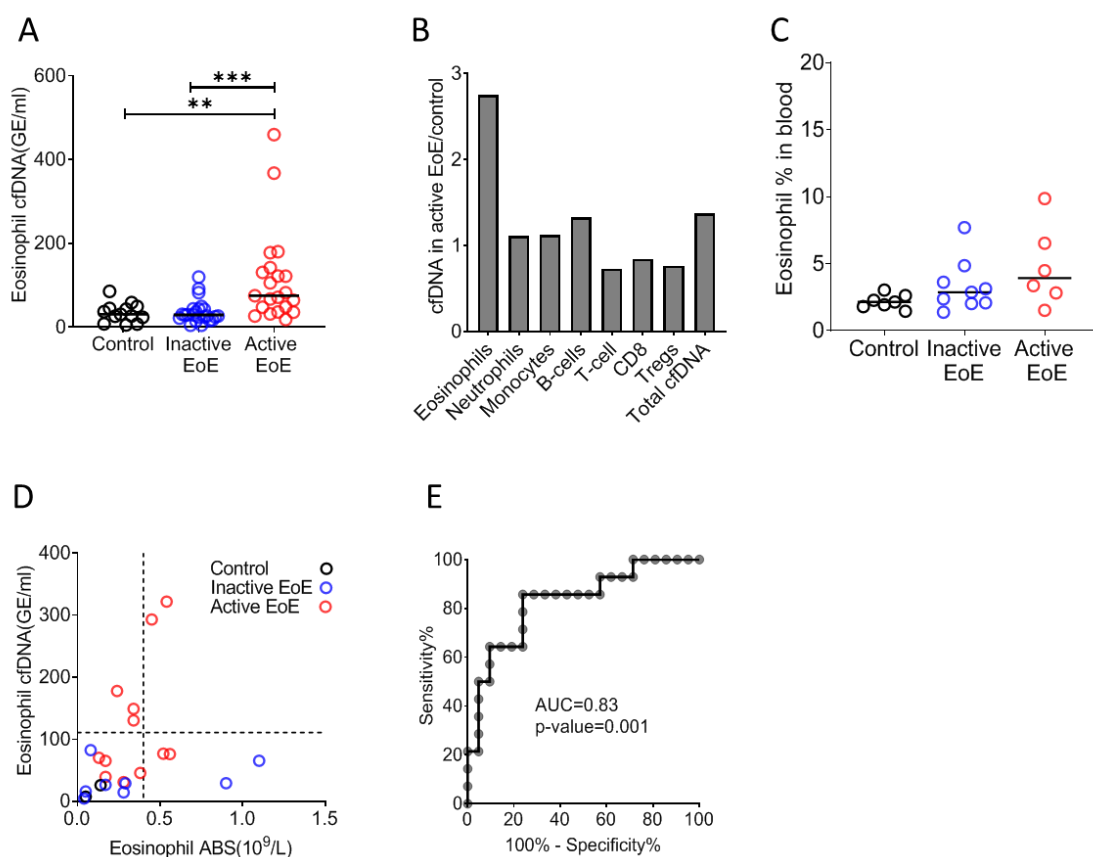



**Figure 4: Selective elevation of eosinophil-derived cfDNA in patients with Eosinophilic Esophagitis.** **A**, eosinophil derived cfDNA in Active EoE patients (n=21) compared with healthy controls (n=14, p-value=0.0056) and patients with EoE in remission (inactive EoE, n=24, p-value=0.0003, Kruskal-Wallis). **B**, differences between immune cfDNA populations in Active EoE patients and healthy controls (mean active EoE/ mean control). **C**, eosinophil DNA markers in whole blood of patients and controls (p-value=0.1, Kruskal-Wallis test). **D**, XY Scatter plot for eosinophil derived cfDNA levels vs. eosinophil absolute count (ABS) in blood. Dashed lines indicate healthy maximal baseline levels of eosinophil absolute counts in blood, and eosinophil-derived cfDNA in plasma. **E**, receiver operating characteristic (ROC) curve for the diagnosis of active EoE, using eosinophil cfDNA levels in plasma of healthy controls and patients with Active EoE.

253

#### 254 **B-cell derived cfDNA elevation in patients with B-cell lymphoma**

255 Hematologic malignancies occurring in remote immune organs such as the bone marrow, spleen and  
256 lymph nodes are often undetectable in peripheral blood(Conlan et al., 1991) . We reasoned that  
257 increased turnover of cancer cells in such malignancies would release cfDNA molecules carrying  
258 methylation marks of the normal cell type from which the tumor originated, informing on tumor  
259 presence and dynamics. In addition, cell type-specific cfDNA markers could reveal collateral damage  
260 incurred by the tumor to normal adjacent cells(Ménétrier-Caux et al., 2019; Ray-Coquard et al., 2009).  
261 To test this idea we examined blood samples from patients with B-cell lymphoma, a disease which  
262 often requires imaging and invasive biopsies for diagnosis and monitoring(Barrington et al., 2014;  
263 Laurent et al., 2017). We studied plasma and blood cells from 17 newly diagnosed (treatment-naïve)  
264 B-cell lymphoma patients (diffuse large B-cell lymphoma, n=6; Hodgkin's lymphoma, n=5; Follicular  
265 lymphoma, n=6) and age-matched healthy controls (**Data file S1**). Lymphoma patients (Mean=264.4  
266 GE/ml) had dramatically elevated levels of B-cell derived cfDNA compared with controls (Mean=18.3  
267 GE/ml, p-value<0.0001), while B cell counts in peripheral blood were actually decreased (control;  
268 Mean=0.162, Lymphoma; Mean=0.079, 10<sup>9</sup>/L, p-value=0.0059, Mann-Whitney) (**Figure 5A-C**). We  
269 observed that the level of B-cell cfDNA accurately distinguished B-cell lymphoma patients from  
270 healthy controls, much better than did B-cell counts (cfDNA, AUC=0.98, p-value<0.0001; B-cell  
271 counts, AUC=0.75, p-value=0.006; **Figure 5D,E**). Total levels of cfDNA as well as the levels of other



272 immune cfDNA markers were also elevated in lymphoma patients, consistent with reports on  
273 alterations in non-B-cells in lymphoma(Simone, 2013). We observed the strongest response in the  
274 levels of B-cell cfDNA (14.4 fold increase compared with controls), CD8 cytotoxic T-cells (10.7 fold)  
275 and Tregs (13.8 fold) (**Figure 5F, Supplemental Figure 6S**). Lymphocyte counts were decreased,  
276 such that the ratio of cfDNA to cell count for each cell type was dramatically elevated in lymphoma  
277 patients (**Figure 5G**). We did not observe a correlation between lymphoma type and immune cfDNA  
278 patterns, perhaps because of the small sample size. To validate these findings, we performed the  
279 analysis on plasma samples from a second, independent cohort of lymphoma patients and healthy  
280 controls. As in the first cohort, we observed elevated B cell cfDNA in patients (lymphoma n=10,  
281 Mean=1473 GE/ml; Control n=34, Mean=15 GE/ml, p-value<0.0001) (**Figure 5H**), accompanied by  
282 lower B cell counts and elevated T cell cfDNA (**Supplemental Figure S7**).

283 These findings indicate that lymphoma growth causes an elevation in the levels of B-cell cfDNA. In  
284 addition, a massive loss of normal T cells leads to extensive release of cfDNA, potentially reflecting  
285 an immune response against the tumor or collateral damage. Taken together across all three conditions  
286 (influenza vaccination, EoE and lymphoma), immune cell dynamics in remote locations that are not  
287 evident in peripheral blood are detectable via cell-specific methylation markers in plasma.

288

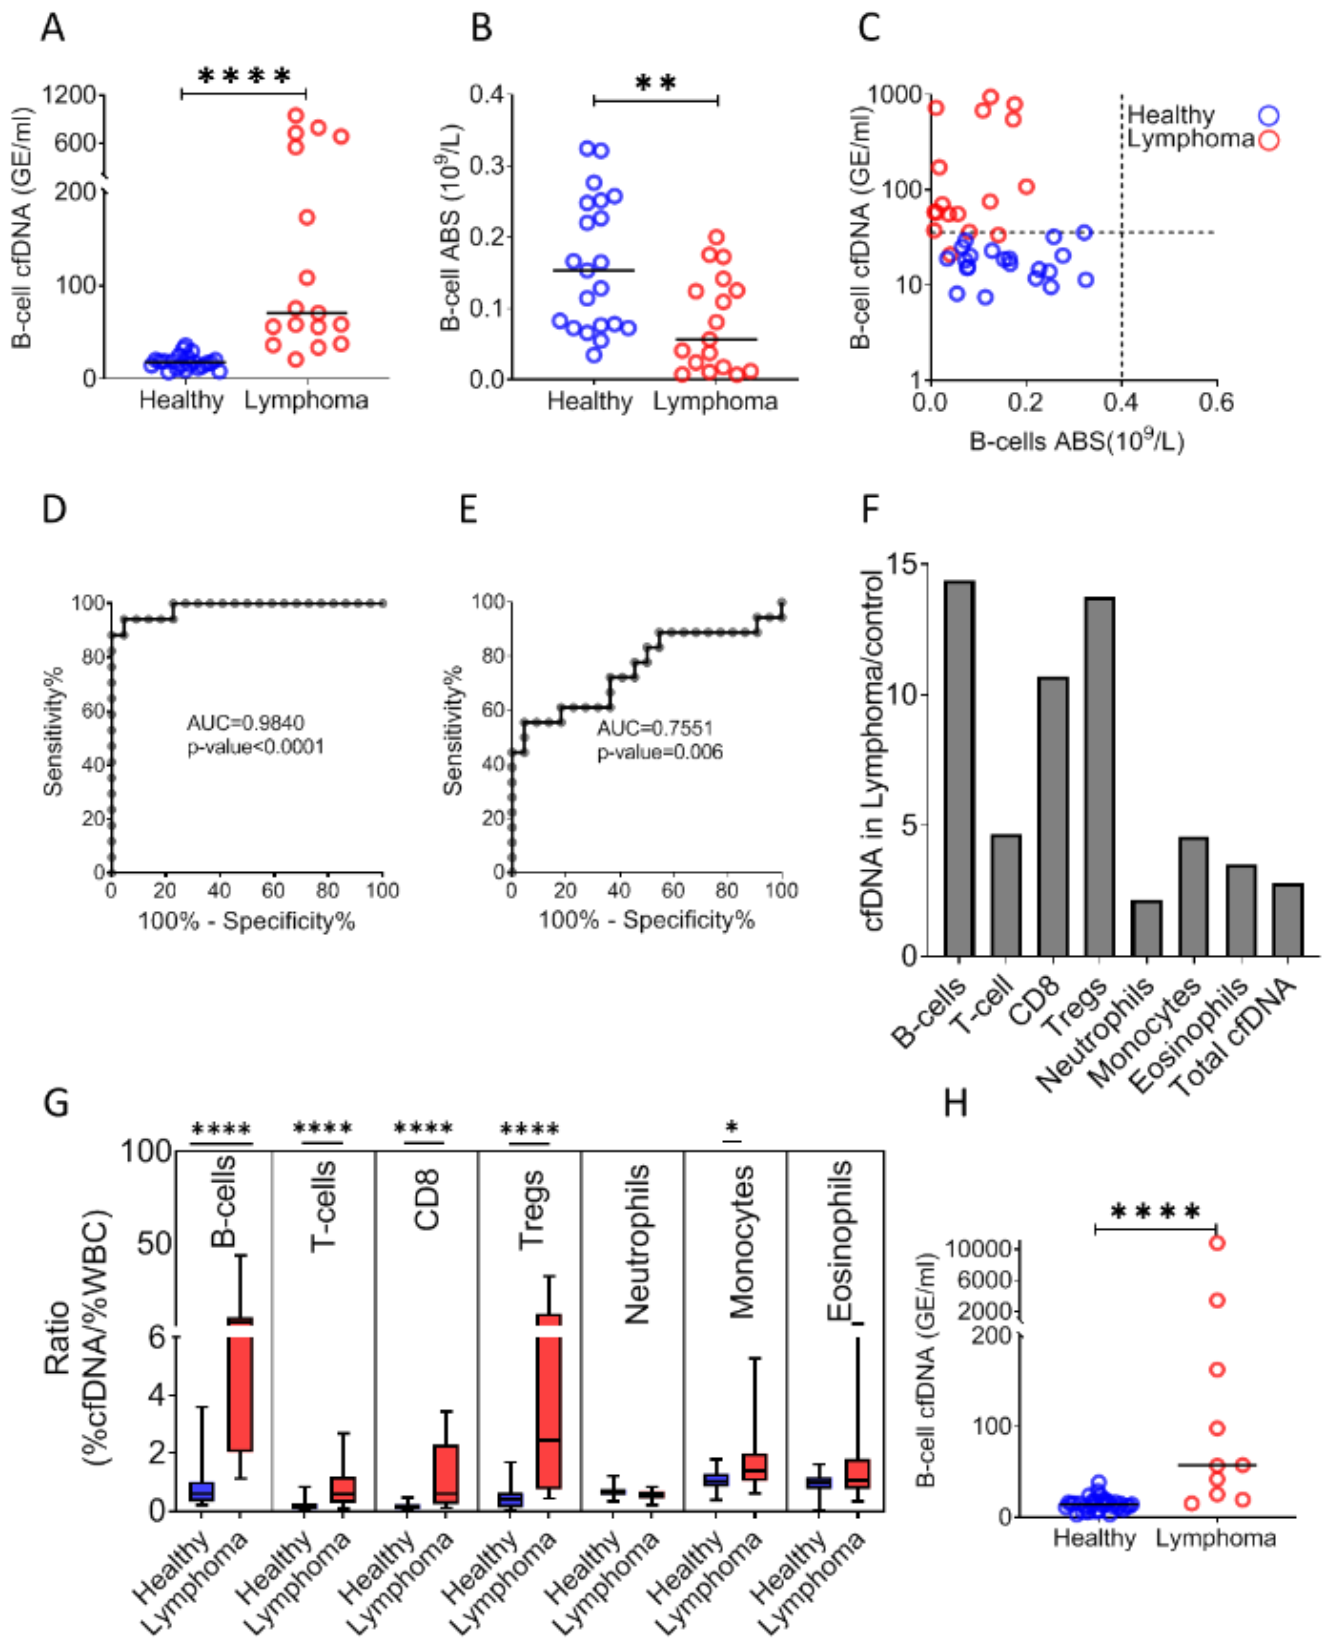

289

290

**Figure 5: B-cell derived cfDNA elevation in patients with B-cell lymphoma.** **A**, B-cell derived cfDNA in patients with lymphoma (n=17) compared with age-matched healthy controls (n=23, p-value<0.0001, Mann-Whitney). **B**, B-cell absolute counts in patients with lymphoma compared with age-matched healthy controls (p-value=0.0059, Mann-Whitney). **C**, XY Scatter plot for B-cell derived cfDNA levels versus B-cell absolute counts in blood. Dashed lines indicate healthy baseline levels of B-cell absolute counts in blood and B-cell cfDNA. **D**, ROC curve for the diagnosis of lymphoma based on B-cell cfDNA levels in healthy subjects and patients with B cell lymphoma. **E**, ROC curve for diagnosis of lymphoma based on B-cell counts. **F**, levels of immune cell type-specific cfDNA in lymphoma patients and healthy controls (mean lymphoma/ mean control). **G**, the ratio between the percentage of cfDNA from a given immune cell type and the percentage of cells from this population in blood according to CBC, in each donor among the healthy volunteers (n=23, blue bars) and patients with lymphoma (n=17, red bars). Boxes represent 25th and 75th percentiles around the median, whiskers span min to max. **H**, B-cell derived cfDNA in an independent cohort of 44 donors including 10 patients with lymphoma and 34 healthy controls (p-value<0.0001, Mann-Whitney).

291

## 292 DISCUSSION

293 We describe a novel method for monitoring turnover dynamics of the human immune system, using  
294 cell type-specific cfDNA methylation markers. The assay opens a window into aspects of human  
295 immune and inflammation biology that are not reflected in blood cell counts or gene expression  
296 patterns. Specifically, the concentration of cfDNA derived from a given immune cell type is a function  
297 of the total number of cells of that type (circulating and remote pools, combined), the lifespan of this  
298 population, determinants of cfDNA release (e.g. efficiency of phagocytosis) and determinants of  
299 cfDNA clearance from plasma (e.g. liver uptake). While many of these parameters are typically  
300 unknown, in some cases cfDNA dynamics may allow to infer a change in cell turnover or in total cell  
301 number outside systemic circulation.

302 Since the method relies on highly stable methylation marks of cell identity(Dor and Cedar, 2018), it is  
303 expected to be universal, with the same markers allowing to accurately monitor immune cell dynamics  
304 in all individuals. While our current assay uses a panel of 17 methylation markers specific to 7 key  
305 immune cell types, future improvements (such as adding markers specific to other cell types) should  
306 increase the resolution of analysis to target essentially all immune cell types. We note that dynamic

307 cellular states may involve changes in gene expression that do not involve reprogramming of DNA  
308 methylation patterns, representing a limitation of the approach.

309 Our cross-sectional and longitudinal analysis of immune cfDNA dynamics in healthy individuals  
310 begins to define the normal range among the population, an essential step towards using the assay for  
311 identifying with confidence deviations from health. More extensive characterization of immune cell  
312 cfDNA in healthy individuals is necessary to interpret trends that were revealed by our healthy cohorts.  
313 For example, we noticed lower levels of neutrophil cfDNA in adult females compared with adult males,  
314 suggesting that neutrophils in females live longer; we speculate that such differences in lifespan  
315 explain why women have a higher steady state neutrophil count(Bain and England, 1975) (and data  
316 not shown). Additional observations of healthy immune cfDNA dynamics that merit further  
317 investigation regard age-related changes, for example elevated monocyte cfDNA and reduced  
318 lymphocyte cfDNA in individuals older than 60. Finally, the intra- and inter-individual variation in  
319 immune cfDNA levels show that unlike blood cell counts, cfDNA levels vary wildly, apparently with  
320 no regulatory mechanism that attracts them to a certain setpoint typical to an individual. We propose  
321 that varying cfDNA levels reflect the action of regulated cell death as a mechanism by which the  
322 healthy body dynamically maintains homeostatic cell numbers within a desired range (model, **Figure**  
323 **6**).

324

325

326

327

328

329

330

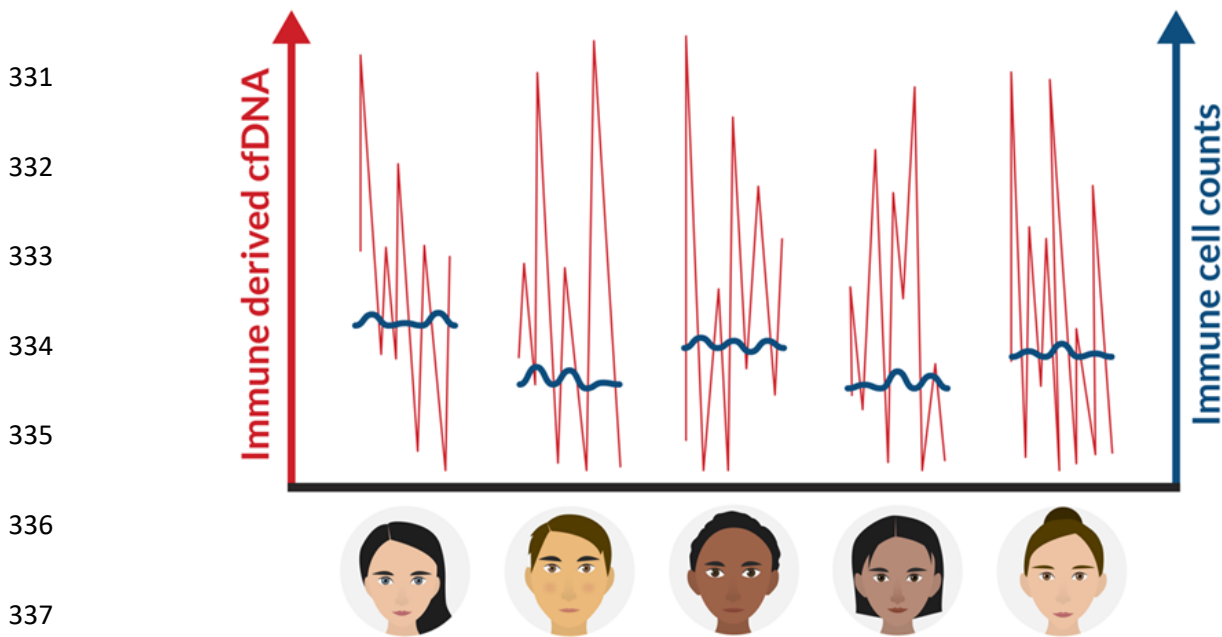

**Figure 6: A schematic view of immune marker variance within individuals.**

Intra-individual variance of immune-cell count (blue) and immune-derived cfDNA (red) in multiple time points. Our findings suggest that while immune cell counts are stable and typical within an individual, immune cell cfDNA levels vary greatly, reflecting changes in cell turnover that help maintain the cell count set point.

338

339 Beyond the healthy baseline, we studied immune cfDNA dynamics in three settings of immune system  
340 perturbation. First, post influenza vaccination we identified an early elevation of B cell cfDNA,  
341 preceding an increase in circulating B-cell counts and showing a striking correlation to the  
342 effectiveness of antibody production, which was independent of the known age-related risk of non-  
343 responsiveness. We propose that elevated B-cell cfDNA reflects early stages in the successful response  
344 of B-cells to the vaccine, including the process of affinity maturation whereby large numbers of B-  
345 cells are generated and eliminated within lymph nodes as a result of insufficient binding to the target  
346 epitope. More work is needed to accurately define the population of B-cells that release cfDNA after  
347 vaccination, and to understand the physiological driver of this response. Practical applications may  
348 include an early indication for the success of experimental vaccination. Second, we examined immune  
349 cfDNA dynamics in EoE, a model for an inflammatory disease in which one tissue is damaged by  
350 infiltration of a specific immune cell population, while leaving a minimal mark on peripheral cell

351 counts. cfDNA analysis revealed the selective elevation of eosinophil turnover in EoE, in some cases  
352 even when circulating eosinophil cell counts are unchanged. Larger scale studies are warranted to  
353 determine if eosinophil cfDNA can be a sufficiently sensitive and specific biomarker for assisting the  
354 clinical diagnosis and monitoring of EoE, ultimately relieving the need for invasive biopsies of the  
355 esophagus. Lastly, cfDNA dynamics in patients with B-cell lymphoma revealed the impact of disease  
356 on the turnover of B-cells and other immune cell types. As with EoE, cfDNA in lymphoma provides a  
357 systemic biomarker of immune processes taking place in remote locations. However in lymphoma,  
358 these processes include both tumor dynamics and host responses – either bystander effects (collateral  
359 damage) or an immune response to the tumor. Potential uses of immune methylation markers in this  
360 field include early diagnosis of hematologic malignancies, detection of minimal residual disease, and  
361 monitoring response to treatment. Beyond hematologic malignancies, immune-derived cfDNA  
362 dynamics can inform on the response to immune checkpoint inhibitors.

363 In summary, analysis of specific immune cell methylation markers in cfDNA allows for monitoring of  
364 human immune cell dynamics, providing temporal and spatial information not accessible via  
365 circulating cell counts. We propose that this novel tool can illuminate healthy and pathologic immune  
366 processes, including non-immune diseases having an inflammatory component such as cancer,  
367 rejection of transplanted organs, metabolic and neurodegenerative disease.

368

## 369 **MATERIALS AND METHODS**

### 370 **Subject enrollment**

371 This study was conducted according to protocols approved by the Institutional Review Board at each  
372 study site, with procedures performed in accordance with the Declaration of Helsinki. Blood and tissue  
373 samples were obtained from donors who have provided written informed consent. When using material

374 from deceased organ donor those with legal authority were consented. Subject characteristics are  
375 presented in **Data file S1**.

376

### 377 **Healthy controls**

378 A total of 234 healthy volunteers (56% females, 44% males, age range 1–85y) participated in the study  
379 as unpaid healthy controls. All denied having any chronic or acute disease.

380

### 381 **Temporal experiment cohort**

382 15 healthy volunteers gave blood each week for 6 weeks (9 females, 6 males, age 21-68y).

383

### 384 **Vaccination cohort and determination of anti-hemagglutinin antibody titers**

385 92 healthy volunteers that received the annual influenza vaccination (55 females, 37 males, age range  
386 20-73y) gave blood samples a day before vaccination, and after 3, 7 and 28 days ( $\pm$  2 days).

387 The anti-hemagglutinin antibody titers were determined using hemagglutination inhibition (HI) assay.  
388 Serum samples obtained from vaccinated and non-vaccinated individuals were stored at  $-20^{\circ}\text{C}$  until  
389 tested treated with receptor destroying enzyme (RDE) (Sigma C8772, diluted 1:4), for 16 h prior to  
390 heat inactivation (30 min,  $56^{\circ}\text{C}$ ). Absorption with erythrocytes was performed to remove non-specific  
391 hemagglutination, in accordance with a modified WHO protocol(Rowe et al., 1999). Serial two-fold  
392 dilutions (1:20–1:2560) of sera in 25  $\mu\text{l}$  PBS were prepared in V-shaped well plates, and an equal  
393 volume of four hemagglutinin (HA) units of viral antigen was added. The mixture was then incubated  
394 at room temperature for 1 h. Fifty microliters of 0.5% chicken erythrocytes suspended in PBS, were  
395 added to the wells, and mixed by shaking the plates on a mechanical vibrator. Agglutination patterns  
396 were read after 30 min and the hemagglutination inhibition (HI) titer was defined as the reciprocal of

397 the last dilution of serum that fully inhibited hemagglutination. The cut-off value selected for a positive  
398 result was 1:40. The influenza antigens for 2018-19 and 2019-20 winter seasons were supplied by the  
399 WHO.

400

#### 401 **EoE cohort**

402 21 active EoE patients, 24 EoE patients in remission and 14 controls were recruited to the study at  
403 Cincinnati Children's Hospital. Diagnosis of EoE patients was made based on an histological biopsy  
404 taken from the distal esophageal tissue.

405

#### 406 **Lymphoma cohort**

407 27 newly diagnosed lymphoma patients that came for treatment in the hematological daycare unit in  
408 Hadassah medical center were recruited to the study in two cohorts (17 patients in cohort #1, 10  
409 patients in cohort #2). Diagnosis was made by PET-CT.

410

#### 411 **Sample collection and processing**

412 Blood samples were collected by routine veinipuncture in 10 mL EDTA Vacutainer® tubes or Streck®  
413 blood collection tubes and stored at room temperature for up to 4 hours or 5 days, respectively. Tubes  
414 were centrifuged at 1,500×g for 10 minutes at 4°C (EDTA tubes) or at room temperature (Streck tubes).  
415 The supernatant was transferred to a fresh 15 mL conical tube without disturbing the cellular layer and  
416 centrifuged again for 10 minutes at 3000×g. The supernatant was collected and stored at -80°C.

417 cfDNA was extracted from 2-4 mL of plasma using the QIA Symphony liquid handling robot (Qiagen).  
418 cfDNA concentration was determined using Qubit double-strand molecular probes kit (Invitrogen)  
419 according to the manufacturer's instructions.



420 DNA derived from all samples was treated with bisulfite using EZ DNA Methylation-Gold™ (Zymo  
421 Research), according to the manufacturer's instructions, and eluted in 24µl elution buffer.

422

### 423 **Immune cell and tissue isolation and processing**

424 PBMCs from a healthy individual were isolated using ficoll-paque density gradient (Miltenyi Biotec).  
425 CD4+ T-cells, CD8+ T-cells, CD19+ B-cells and Nk CD56+ cells were positively selected using  
426 magnetic MicroBeads. Monocytes were negatively selected (Miltenyi Biotec) as instructed by the  
427 manufacturer. Regulatory T-cells (CD4+,CD25+,FOXP3+, 28.5% purity) were purchased from  
428 Astarte biologics. Neutrophils and eosinophils were isolated based on a previously published  
429 protocol(Hartman et al., 2001; Sagiv et al., 2016) Genomic DNA from other tissues was purchased as  
430 previously described(Lehmann-Werman et al., 2016; Zemmour et al., 2018).

431

### 432 **Selection of immune cell methylation markers**

433 immune-cell-specific methylation candidate biomarkers were selected using comparative methylome  
434 analysis, based on publicly available datasets(Moss et al., 2018a), to identify loci having more than  
435 five CpG sites within 150bp, with an average methylation value for a specific cytosine (present on  
436 Illumina 450K arrays) of less than 0.3 in the specific immune cell type and greater than 0.8 in over  
437 90% of tissues and other immune cells. From our previously-described atlas of human tissue-specific  
438 methylomes(Lehmann-Werman et al., 2016), we identified ~50 CpG sites that are unmethylated in  
439 specific immune-cells and methylated in all other major immune cells and tissues. We selected two to  
440 three of these sites for Neutrophils (i.e., NEUT1, NEUT2, NEUT3), Monocytes (i.e., MONO1,  
441 MONO2), Eosinophils (i.e., EOSI1, EOSI2, EOSI3), B-cells (i.e., B-CELL1, B-CELL2) T-cells (i.e.,  
442 T-CELL1, T-CELL2), CD8 T-cells (CD8A, CD8B), Regulatory T-cells (TREG1, TREG2) and  
443 designed primers to amplify ~100bp fragments surrounding them using the multiplex two-step PCR

444 amplification method(Neiman et al., 2020). Marker coordinates and primer sequences are provided in  
445 **Supplementary Table S1.**

446

#### 447 **PCR**

448 To efficiently amplify and sequence multiple targets from bisulfite-treated cfDNA, we developed a  
449 two-step multiplexed PCR protocol. In the first step, up to 30 pairs primer pairs were used in one PCR  
450 reaction to amplify regions of interest from bisulfite-treated DNA, independent of methylation status.  
451 Primers were 18-30 base pairs (bp) with primer melting temperature ranging from 58-62°C. To  
452 maximize amplification efficiency and minimize primer interference, the primers were designed with  
453 additional 25bp adaptors comprising Illumina TruSeq Universal Adaptors without index tags. All  
454 primers were mixed in the same reaction tube. For each sample, the PCR reaction was prepared using  
455 the QIAGEN Multiplex PCR Kit according to manufacturer instructions with 7µl of bisulfite treated  
456 cfDNA. Reaction conditions for the first round of PCR were: 95°C for 15 minutes, followed by 30  
457 cycles of 95°C for 30 seconds, 57°C for 3 minutes and 72°C for 1.5 minutes, followed by 10 minutes  
458 at 68°C.

459 In the second PCR step, the products of the first PCR reaction were treated with Exonuclease I  
460 (ThermoScientific) for primer removal according to the manufacturer instructions. Cleaned PCR  
461 products were amplified using one unique TruSeq Universal Adaptor primer pair per sample to add a  
462 unique index barcode to enable sample pooling for multiplex Illumina sequencing. The PCR reaction  
463 was prepared using 2x PCR BIO HS Taq Mix Red Kit (PCR Biosystems) according to manufacturer  
464 instructions. Reaction conditions for the second round of PCR were: 95°C for 2 minutes, followed by  
465 15 cycles of 95°C for 30 seconds, 59°C for 1.5 minutes, 72°C for 30 seconds, followed by 10 minutes  
466 at 72°C. The PCR products were then pooled, run on 3% agarose gels with ethidium bromide staining,  
467 and extracted by Zymo GEL Recovery kit.

468

## 469 **Next Generation Sequencing**

470 Pooled PCR products were subjected to multiplex next-generation sequencing (NGS) using the MiSeq  
471 Reagent Kit v2 (Illumina) or the *NextSeq* 500/550 v2 Reagent Kit (Illumina). Sequenced reads were  
472 separated by barcode, aligned to the target sequence, and analyzed using custom scripts written and  
473 implemented in R. Reads were quality filtered based on Illumina quality scores. Reads were identified  
474 as having at least 80% similarity to the target sequences and containing all the expected CpGs. CpGs  
475 were considered methylated if “CG” was read and unmethylated if “TG” was read. Proper bisulfite  
476 conversion was assessed by analyzing methylation of non-CpG cytosines. We then determined the  
477 fraction of molecules in which all CpG sites were unmethylated. The fraction obtained was multiplied  
478 by the concentration of cfDNA measured in each sample, to obtain the concentration of tissue-specific  
479 cfDNA from each donor.

480

## 481 **Deconvolution**

482 WGBS data were converted to an array-like format by calculating the average methylation at 7,890  
483 CpGs from the Moss et al methylation atlas (Moss et al., 2018a). We then ran the deconvolution  
484 algorithm ([https://github.com/nloyfer/meth\\_atlas](https://github.com/nloyfer/meth_atlas)) for each WBC and cfDNA sample.

485

## 486 **Statistics**

487 To assess the correlation between groups we used Pearson's correlation test. To determine the  
488 significance of differences between groups we used a non-parametric two-tailed Mann–Whitney test.  
489 For multiple comparisons, a Kruskal-Wallis multiple comparison test was used. P-value was  
490 considered significant when  $<0.05$ . To detect outliers in the healthy population we applied a multiple

491 outlier detection ROUT-test (Q=5%)(Motulsky and Brown, 2006). Samples that were detected as  
492 outliers were excluded. All Statistical analyses were performed with GraphPad Prism 8.4.3.

493

#### 494 **Intra-individual and inter-individual variation**

495 Intra-individual coefficient of variation for each immune cell type in CBC, whole blood and cfDNA  
496 was calculated for each person across six different time points. The Inter-individual coefficient of  
497 variation for each immune-cell type was calculated for each time point across all individuals. The  
498 average of the intra-individual coefficient of variation was calculated. To prevent a bias due to  
499 difference in sample size (intra-individual variation, 6 time points; inter-individual variation, 15  
500 individuals), we used R (version3.6.1) to sample all different combinations of a randomly selected 6  
501 person group and calculated the inter-individual coefficient of variation. Coefficients of variation of  
502 the different combinations were averaged.

503

#### 504 **Author contributions**

505 Conceptualization- I.F-F, T.K, B.G, R.S, Y.D; Investigation- I.F-F, S.P, B-L.O, A.K, Ju.M, A.P, N.L,  
506 Jo.M, D.C, Y.D, N.F, J.M.C, M.R, A.J, G.C; Resources- M.M, M.E.R, D.L, T.K; Writing – I.F-F, B.G,  
507 R.S, Y.D.

508

#### 509 **Acknowledgements**

510 We thank Daniela Beller from the Maccabi TIPA biobank for providing data on blood cell counts, and  
511 the many volunteers who donated blood for this study. We thank Shai Shen-Orr for critical reading of  
512 the manuscript, and Nir Friedman, Ron Milo, Ron Sender and Mordechai Slae for fruitful discussions.  
513 We thank Idit Shiff and Abed Nasseredin from the Genomics lab of the Core Research Facility (CRF)

514 at The Faculty of Medicine, The Hebrew University of Jerusalem. For their support in DNA and  
515 sequencing analysis.

516 This work was supported by grants from Human Islet Research Network (HIRN UC4DK116274 and  
517 UC4DK104216 to R.S and Y.D); JDRF (3-SRA-2014-38 and 1-SRA-2019-705), Ernest and Bonnie  
518 Beutler Research Program of Excellence in Genomic Medicine, The Alex U Soyka pancreatic cancer  
519 fund, The Israel Science Foundation, the Waldholtz / Pakula family, the Robert M. and Marilyn  
520 Sternberg Family Charitable Foundation, the Helmsley Charitable Trust, Grail and the DON  
521 Foundation (to Y.D). Y.D holds the Walter and Greta Stiel Chair and Research grant in Heart studies.  
522 I.F-F received a fellowship from the Glassman Hebrew University Diabetes Center.

523

## 524 **References**

- 525 Aceves SS, Newbury RO, Dohil R, Schwimmer J, Bastian JF. 2007. Distinguishing eosinophilic  
526 esophagitis in pediatric patients: Clinical, endoscopic, and histologic features of an emerging  
527 disorder. *J Clin Gastroenterol*. doi:10.1097/01.mcg.0000212639.52359.fl
- 528 Alpert A, Pickman Y, Leipold M, Rosenberg-Hasson Y, Ji X, Gaujoux R, Rabani H, Starosvetsky E,  
529 Kveler K, Schaffert S, Furman D, Caspi O, Rosenschein U, Khatri P, Dekker CL, Maecker HT,  
530 Davis MM, Shen-Orr SS. 2019. A clinically meaningful metric of immune age derived from  
531 high-dimensional longitudinal monitoring. *Nat Med*. doi:10.1038/s41591-019-0381-y
- 532 Bain BJ, England JM. 1975. Normal Haematological Values: Sex Difference in Neutrophil Count. *Br*  
533 *Med J*. doi:10.1136/bmj.1.5953.306
- 534 Baron U, Werner J, Schildknecht K, Schulze JJ, Mulu A, Liebert UG, Sack U, Speckmann C, Gossen  
535 M, Wong RJ, Stevenson DK, Babel N, Schürmann D, Baldinger T, Bacchetta R, Grützkau A,  
536 Borte S, Olek S. 2018. Epigenetic immune cell counting in human blood samples for  
537 immunodiagnosics. *Sci Transl Med*. doi:10.1126/scitranslmed.aan3508

- 538 Barrington SF, Mikhaeel NG, Kostakoglu L, Meignan M, Hutchings M, Müeller SP, Schwartz LH,  
539 Zucca E, Fisher RI, Trotman J, Hoekstra OS, Hicks RJ, O'Doherty MJ, Hustinx R, Biggi A,  
540 Cheson BD. 2014. Role of imaging in the staging and response assessment of lymphoma:  
541 Consensus of the international conference on malignant lymphomas imaging working group. *J*  
542 *Clin Oncol*. doi:10.1200/JCO.2013.53.5229
- 543 Bianchi DW, Lamar Parker R, Wentworth J, Madankumar R, Saffer C, Das AF, Craig JA, Chudova  
544 DI, Devers PL, Jones KW, Oliver K, Rava RP, Sehnert AJ. 2014. DNA sequencing versus  
545 standard prenatal aneuploidy screening. *N Engl J Med*. doi:10.1056/NEJMoa1311037
- 546 Carr EJ, Dooley J, Garcia-Perez JE, Lagou V, Lee JC, Wouters C, Meyts I, Goris A, Boeckxstaens  
547 G, Linterman MA, Liston A. 2016. The cellular composition of the human immune system is  
548 shaped by age and cohabitation. *Nat Immunol*. doi:10.1038/ni.3371
- 549 Cheng AP, Burnham P, Lee JR, Cheng MP, Suthanthiran M, Dadhania D, De Vlaminc I. 2019. A  
550 cell-free DNA metagenomic sequencing assay that integrates the host injury response to  
551 infection. *Proc Natl Acad Sci U S A*. doi:10.1073/pnas.1906320116
- 552 Christina Fan H, Gu W, Wang J, Blumenfeld YJ, El-Sayed YY, Quake SR. 2012. Non-invasive  
553 prenatal measurement of the fetal genome. *Nature*. doi:10.1038/nature11251
- 554 Conlan MG, Armitage JO, Bast M, Weisenburger DD. 1991. Clinical significance of hematologic  
555 parameters in non-Hodgkin's lymphoma at diagnosis. *Cancer*. doi:10.1002/1097-  
556 0142(19910301)67:5<1389::AID-CNCR2820670519>3.0.CO;2-Q
- 557 De Vlaminc I, Martin L, Kertesz M, Patel K, Kowarsky M, Strehl C, Cohen G, Luikart H, Neff NF,  
558 Okamoto J, Nicolls MR, Cornfield D, Weill D, Valantine H, Khush KK, Quake SR. 2015.  
559 Noninvasive monitoring of infection and rejection after lung transplantation. *Proc Natl Acad Sci*  
560 *U S A*. doi:10.1073/pnas.1517494112

- 561 De Vlaminck I, Valantine HA, Snyder TM, Strehl C, Cohen G, Luikart H, Neff NF, Okamoto J,  
562 Bernstein D, Weisshaar D, Quake SR, Khush KK. 2014. Circulating cell-free DNA enables  
563 noninvasive diagnosis of heart transplant rejection. *Sci Transl Med*.  
564 doi:10.1126/scitranslmed.3007803
- 565 Del Giudice G, Weinberger B, Grubeck-Loebenstein B. 2015. Vaccines for the elderly. *Gerontology*.  
566 doi:10.1159/000366162
- 567 Dellon ES, Gibbs WB, Fritchie KJ, Rubinas TC, Wilson LA, Woosley JT, Shaheen NJ. 2009.  
568 Clinical, Endoscopic, and Histologic Findings Distinguish Eosinophilic Esophagitis From  
569 Gastroesophageal Reflux Disease. *Clin Gastroenterol Hepatol*. doi:10.1016/j.cgh.2009.08.030
- 570 Dor Y, Cedar H. 2018. Principles of DNA methylation and their implications for biology and  
571 medicine. *Lancet*. doi:10.1016/S0140-6736(18)31268-6
- 572 Gabay C, Kushner I. 1999. Acute-phase proteins and other systemic responses to inflammation. *N*  
573 *Engl J Med*. doi:10.1056/NEJM199902113400607
- 574 Gage E, Van Hove N, Coler R. 2018. Memory CD4+ T cells guide memory B cell adaptability to  
575 drifting influenza vaccination. *J Immunol* **200**.
- 576 Hartman ML, Piliponsky AM, Temkin V, Levi-Schaffer F. 2001. Human peripheral blood  
577 eosinophils express stem cell factor. *Blood*. doi:10.1182/blood.V97.4.1086
- 578 Heitzer E, Haque IS, Roberts CES, Speicher MR. 2019. Current and future perspectives of liquid  
579 biopsies in genomics-driven oncology. *Nat Rev Genet*. doi:10.1038/s41576-018-0071-5
- 580 Laurent C, Baron M, Amara N, Haioun C, Dandoit M, Maynadié M, Parrens M, Vergier B, Copie-  
581 Bergman C, Fabiani B, Traverse-Glehen A, Brousse N, Copin MC, Tas P, Petrella T, Rousselet  
582 MC, Brière J, Charlotte F, Chassagne-Clement C, Rousset T, Xerri L, Moreau A, Martin A,  
583 Damotte D, Dartigues P, Soubeyran I, Pech M, Dechelotte P, Michiels JF, De Mascarel A,

- 584 Berger F, Bossard C, Arbion F, Quintin-Roué I, Picquenot JM, Patey M, Fabre B, Sevestre H,  
585 Le Naoures C, Chenard-Neu MP, Bastien C, Thiebault S, Martin L, Delage M, Filleron T,  
586 Salles G, Molina TJ, Delsol G, Brousset P, Gaulard P. 2017. Impact of expert pathologic review  
587 of lymphoma diagnosis: Study of patients from the French Lymphopath network. *J Clin Oncol*.  
588 doi:10.1200/JCO.2016.71.2083
- 589 Lehmann-Werman R, Neiman D, Zemmour H, Moss J, Magenheim J, Vaknin-Dembinsky A,  
590 Rubertsson S, Nellgård B, Blennow K, Zetterberg H, Spalding K, Haller MJ, Wasserfall CH,  
591 Schatz DA, Greenbaum CJ, Dorrell C, Grompe M, Zick A, Hubert A, Maoz M, Fendrich V,  
592 Bartsch DK, Golan T, Ben Sasson SA, Zamir G, Razin A, Cedar H, Shapiro AMJ, Glaser B,  
593 Shemer R, Dor Y. 2016. Identification of tissue-specific cell death using methylation patterns of  
594 circulating DNA. *Proc Natl Acad Sci*. doi:10.1073/pnas.1519286113
- 595 Li GM, Chiu C, Wrammert J, McCausland M, Andrews SF, Zheng NY, Lee JH, Huang M, Qu X,  
596 Edupuganti S, Mulligan M, Das SR, Yewdell JW, Mehta AK, Wilson PC, Ahmed R. 2012.  
597 Pandemic H1N1 influenza vaccine induces a recall response in humans that favors broadly  
598 cross-reactive memory B cells. *Proc Natl Acad Sci U S A*. doi:10.1073/pnas.1118979109
- 599 Liacouras CA, Furuta GT, Hirano I, Atkins D, Attwood SE, Bonis PA, Burks AW, Chehade M,  
600 Collins MH, Dellon ES, Dohil R, Falk GW, Gonsalves N, Gupta SK, Katzka DA, Lucendo AJ,  
601 Markowitz JE, Noel RJ, Odze RD, Putnam PE, Richter JE, Romero Y, Ruchelli E, Sampson  
602 HA, Schoepfer A, Shaheen NJ, Sicherer SH, Spechler S, Spergel JM, Straumann A, Wershil  
603 BK, Rothenberg ME, Aceves SS. 2011. Eosinophilic esophagitis: Updated consensus  
604 recommendations for children and adults. *J Allergy Clin Immunol*.  
605 doi:10.1016/j.jaci.2011.02.040
- 606 Lo YMD, Corbetta N, Chamberlain PF, Rai V, Sargent IL, Redman CW, Wainscoat JS. 1997.  
607 Presence of fetal DNA in maternal plasma and serum. *Lancet*. doi:10.1016/S0140-



608 6736(97)02174-0

609 Maas K, Chan S, Parker J, Slater A, Moore J, Olsen N, Aune TM. 2002. Cutting Edge: Molecular  
610 Portrait of Human Autoimmune Disease. *J Immunol*. doi:10.4049/jimmunol.169.1.5

611 Macallan DC, Wallace DL, Zhang V, Ghattas H, Asquith B, De Lara C, Worth A,  
612 Panayiotakopoulos G, Griffin GE, Tough DF, Beverley PCL. 2005. B-cell kinetics in humans:  
613 Rapid turnover of peripheral blood memory cells. *Blood*. doi:10.1182/blood-2004-09-3740

614 Ménétrier-Caux C, Ray-Coquard I, Blay JY, Caux C. 2019. Lymphopenia in Cancer Patients and its  
615 Effects on Response to Immunotherapy: An opportunity for combination with Cytokines? *J*  
616 *Immunother Cancer*. doi:10.1186/s40425-019-0549-5

617 Michie CA, McLean A, Alcock C, Beverley PCL. 1992. Lifespan of human lymphocyte subsets  
618 defined by CD45 isoforms. *Nature*. doi:10.1038/360264a0

619 Moss J, Magenheimer J, Neiman D, Zemmour H, Loyfer N, Korach A, Samet Y, Maoz M, Druid H,  
620 Arner P, Fu K-Y, Kiss E, Spalding KL, Landesberg G, Zick A, Grinshpun A, Shapiro AMJ,  
621 Grompe M, Wittenberg AD, Glaser B, Shemer R, Kaplan T, Dor Y. 2018a. Comprehensive  
622 human cell-type methylation atlas reveals origins of circulating cell-free DNA in health and  
623 disease. *Nat Commun*. doi:10.1038/s41467-018-07466-6

624 Moss J, Magenheimer J, Neiman D, Zemmour H, Loyfer N, Korach A, Samet Y, Maoz M, Druid H,  
625 Arner P, Fu KY, Kiss E, Spalding KL, Landesberg G, Zick A, Grinshpun A, Shapiro AMJ,  
626 Grompe M, Wittenberg AD, Glaser B, Shemer R, Kaplan T, Dor Y. 2018b. Comprehensive  
627 human cell-type methylation atlas reveals origins of circulating cell-free DNA in health and  
628 disease. *Nat Commun*. doi:10.1038/s41467-018-07466-6

629 Motulsky HJ, Brown RE. 2006. Detecting outliers when fitting data with nonlinear regression - A  
630 new method based on robust nonlinear regression and the false discovery rate. *BMC*

- 631 *Bioinformatics*. doi:10.1186/1471-2105-7-123
- 632 Nakaya HI, Wrammert J, Lee EK, Racioppi L, Marie-Kunze S, Haining WN, Means AR, Kasturi SP,  
633 Khan N, Li GM, McCausland M, Kanchan V, Kokko KE, Li S, Elbein R, Mehta AK, Aderem  
634 A, Subbarao K, Ahmed R, Pulendran B. 2011. Systems biology of vaccination for seasonal  
635 influenza in humans. *Nat Immunol*. doi:10.1038/ni.2067
- 636 Neiman D, Gillis D, Piyanzin S, Cohen D, Fridlich O, Moss J, Zick A, Oron T, Sundberg F,  
637 Forsander G, Skog O, Korsgren O, Levy-Khademi F, Arbel D, Hashavia S, Shapiro AMJ,  
638 Speake C, Greenbaum C, Hosford J, Posgai A, Atkinson MA, Glaser B, Schatz DA, Shemer R,  
639 Dor Y. 2020. Multiplexing DNA methylation markers to detect circulating cell-free DNA  
640 derived from human pancreatic  $\beta$  cells. *JCI insight*. doi:10.1172/jci.insight.136579
- 641 Patel AA, Zhang Y, Fullerton JN, Boelen L, Rongvaux A, Maini AA, Bigley V, Flavell RA, Gilroy  
642 DW, Asquith B, Macallan D, Yona S. 2017. The fate and lifespan of human monocyte subsets  
643 in steady state and systemic inflammation. *J Exp Med*. doi:10.1084/jem.20170355
- 644 Ranjeva S, Subramanian R, Fang VJ, Leung GM, Ip DKM, Perera RAPM, Peiris JSM, Cowling BJ,  
645 Cobey S. 2019. Age-specific differences in the dynamics of protective immunity to influenza.  
646 *Nat Commun*. doi:10.1038/s41467-019-09652-6
- 647 Ray-Coquard I, Cropet C, Van Glabbeke M, Sebban C, Le Cesne A, Judson I, Tredan O, Verweij J,  
648 Biron P, Labidi I, Guastalla JP, Bachelot T, Perol D, Chabaud S, Hogendoorn PCW, Cassier P,  
649 Dufresne A, Blay JY. 2009. Lymphopenia as a prognostic factor for overall survival in  
650 advanced carcinomas, sarcomas, and lymphomas. *Cancer Res*. doi:10.1158/0008-5472.CAN-  
651 08-3845
- 652 Rowe T, Abernathy RA, Hu-Primmer J, Thompson WW, Lu X, Lim W, Fukuda K, Cox NJ, Katz  
653 JM. 1999. Detection of antibody to avian influenza a (H5N1) virus in human serum by using a  
654 combination of serologic assays. *J Clin Microbiol*. doi:10.1128/jcm.37.4.937-943.1999

- 655 Sagiv JY, Voels S, Granot Z. 2016. Isolation and characterization of low- vs. High-density  
656 neutrophils in cancer *Methods in Molecular Biology*. doi:10.1007/978-1-4939-3801-8\_13
- 657 Siegrist CA, Aspinall R. 2009. B-cell responses to vaccination at the extremes of age. *Nat Rev*  
658 *Immunol*. doi:10.1038/nri2508
- 659 Simone B. 2013. The peripheral blood compartment of patients with Diffuse Large B Cell  
660 Lymphoma (DLBCL) at diagnosis is characterized by distinct phenotypic and functional  
661 Immunological alterations. *Front Immunol* **4**. doi:10.3389/conf.fimmu.2013.02.00034
- 662 Sproston NR, Ashworth JJ. 2018. Role of C-reactive protein at sites of inflammation and infection.  
663 *Front Immunol*. doi:10.3389/fimmu.2018.00754
- 664 Sun K, Jiang P, Chan KCA, Wong J, Cheng YKY, Liang RHS, Chan WK, Ma ESK, Chan SL,  
665 Cheng SH, Chan RWY, Tong YK, Ng SSM, Wong RSM, Hui DSC, Leung TN, Leung TY, Lai  
666 PBS, Chiu RWK, Lo YMD. 2015. Plasma DNA tissue mapping by genome-wide methylation  
667 sequencing for noninvasive prenatal, cancer, and transplantation assessments. *Proc Natl Acad*  
668 *Sci U S A*. doi:10.1073/pnas.1508736112
- 669 Tuller T, Atar S, Ruppin E, Gurevich M, Achiron A. 2013. Common and specific signatures of gene  
670 expression and protein-protein interactions in autoimmune diseases. *Genes Immun*.  
671 doi:10.1038/gene.2012.55
- 672 Victora GD, Wilson PC. 2015. Germinal Center Selection and the Antibody Response to Influenza.  
673 *Cell*. doi:10.1016/j.cell.2015.10.004
- 674 Voigt EA, Grill DE, Zimmermann MT, Simon WL, Ovsyannikova IG, Kennedy RB, Poland GA.  
675 2018. Transcriptomic signatures of cellular and humoral immune responses in older adults after  
676 seasonal influenza vaccination identified by data-driven clustering. *Sci Rep*.  
677 doi:10.1038/s41598-017-17735-x

- 678 Wagner A, Garner-Spitzer E, Jasinska J, Kollaritsch H, Stiasny K, Kundi M, Wiedermann U. 2018.  
679 Age-related differences in humoral and cellular immune responses after primary immunisation:  
680 Indications for stratified vaccination schedules. *Sci Rep*. doi:10.1038/s41598-018-28111-8
- 681 Wan JCM, Massie C, Garcia-Corbacho J, Mouliere F, Brenton JD, Caldas C, Pacey S, Baird R,  
682 Rosenfeld N. 2017. Liquid biopsies come of age: Towards implementation of circulating  
683 tumour DNA. *Nat Rev Cancer*. doi:10.1038/nrc.2017.7
- 684 Zemmour H, Planer D, Magenheim J, Moss J, Neiman D, Gilon D, Korach A, Glaser B, Shemer R,  
685 Landesberg G, Dor Y. 2018. Non-invasive detection of human cardiomyocyte death using  
686 methylation patterns of circulating DNA. *Nat Commun*. doi:10.1038/s41467-018-03961-y
- 687

## Supplementary Table S1

Genomic coordinates of immune cell type-specific methylation markers used in this study, and primer sequences used to amplify these loci after bisulfite conversion.

| Marker  | Coordinate of central CpG | Forward primer            | Reverse primer            |
|---------|---------------------------|---------------------------|---------------------------|
| Neut1   | chr9:129648322            | TTTAAAGAAGTTTTGTGTTATTAT  | TCTAAAATACCTAAATACAAACC   |
| Neut2   | chr8:142180109            | GTTTGTTTTGAGATGTGAGAAT    | ATAACATCCTTACAAACTCACAA   |
| Neut3   | chr11:33308345            | TGTAGGTATTTTAGATTGGGG     | AATTATCCAACCTCCTCACTCTTA  |
| Mono1   | chr11:32055233            | TTTGTTAGGTTAAGTAATTTGTAAA | CATCTCCTACTTAAATAACTTCAAT |
| Mono2   | chr10:114911652           | TGAAGGAAATGAGAGTAAAGGT    | CCCTTCTCCCTAAAAAAAAC      |
| B-cell1 | chr11:121440880           | AGGTTGTTTTTTATTTTTAGAT    | TTCCCTCCCTTAATAACTAT      |
| B-cell2 | chr17:3493666             | TTTTAAAGAAGTTTTTATGGGT    | ATAAACCAAACAACACTACACAT   |
| B-cell3 | chr11:34167855            | ATTTTTTTGGTTGGATTGTT      | TCACAAACACACAAACCCAA      |
| T-cell1 | chr14:61801201            | GGTGTATAGGTAGGGTAGAGAA    | CCAACATTTATCATTTTCTTCA    |
| T-cell2 | chr13:24825973            | AGTATTTTTATTGGTTGGAT      | CCTACTACCTCAAATTAACTAAAA  |
| CD8A    | chr2:87012810             | TTAGTTTTTTTAGTATGATTTTGAG | CACCACAAAATCACAATACTAT    |
| CD8B    | chr:87048747              | GTTAAGAAATTAATAGGAAAAGAA  | AAAACCCCATATTACTTCCC      |
| TREG1   | chrx:49118313             | TTAGGTTTGGATTTTAATTTTG    | CCCTAACCTTATCTACTCCA      |
| TREG2   | chrx:49117224             | TGGGTTTTGTTGTTATAGTTTT    | ATATCTACCCTCTTCTTCTCCTC   |
| EOSI1   | chr3:195974300            | GGGGTATTTTTTATTATTTTATT   | ACACACAACCTTCAAAAACCTCA   |
| EOSI2   | chr4:3123132              | GGAGTTGTTGTAGTAGTTTTTTAGA | AAATTCCACAATACTCCCCTA     |
| EOSI3   | chr1:6341327              | TTTGAGAGTTGTTTATAATAGGGT  | CCTCCCTTCTCCACAAACTA      |

**Data file S1: Blood donor characteristics (see excel file).**

# Supplemental Figure S1 (Related to Figure 1)

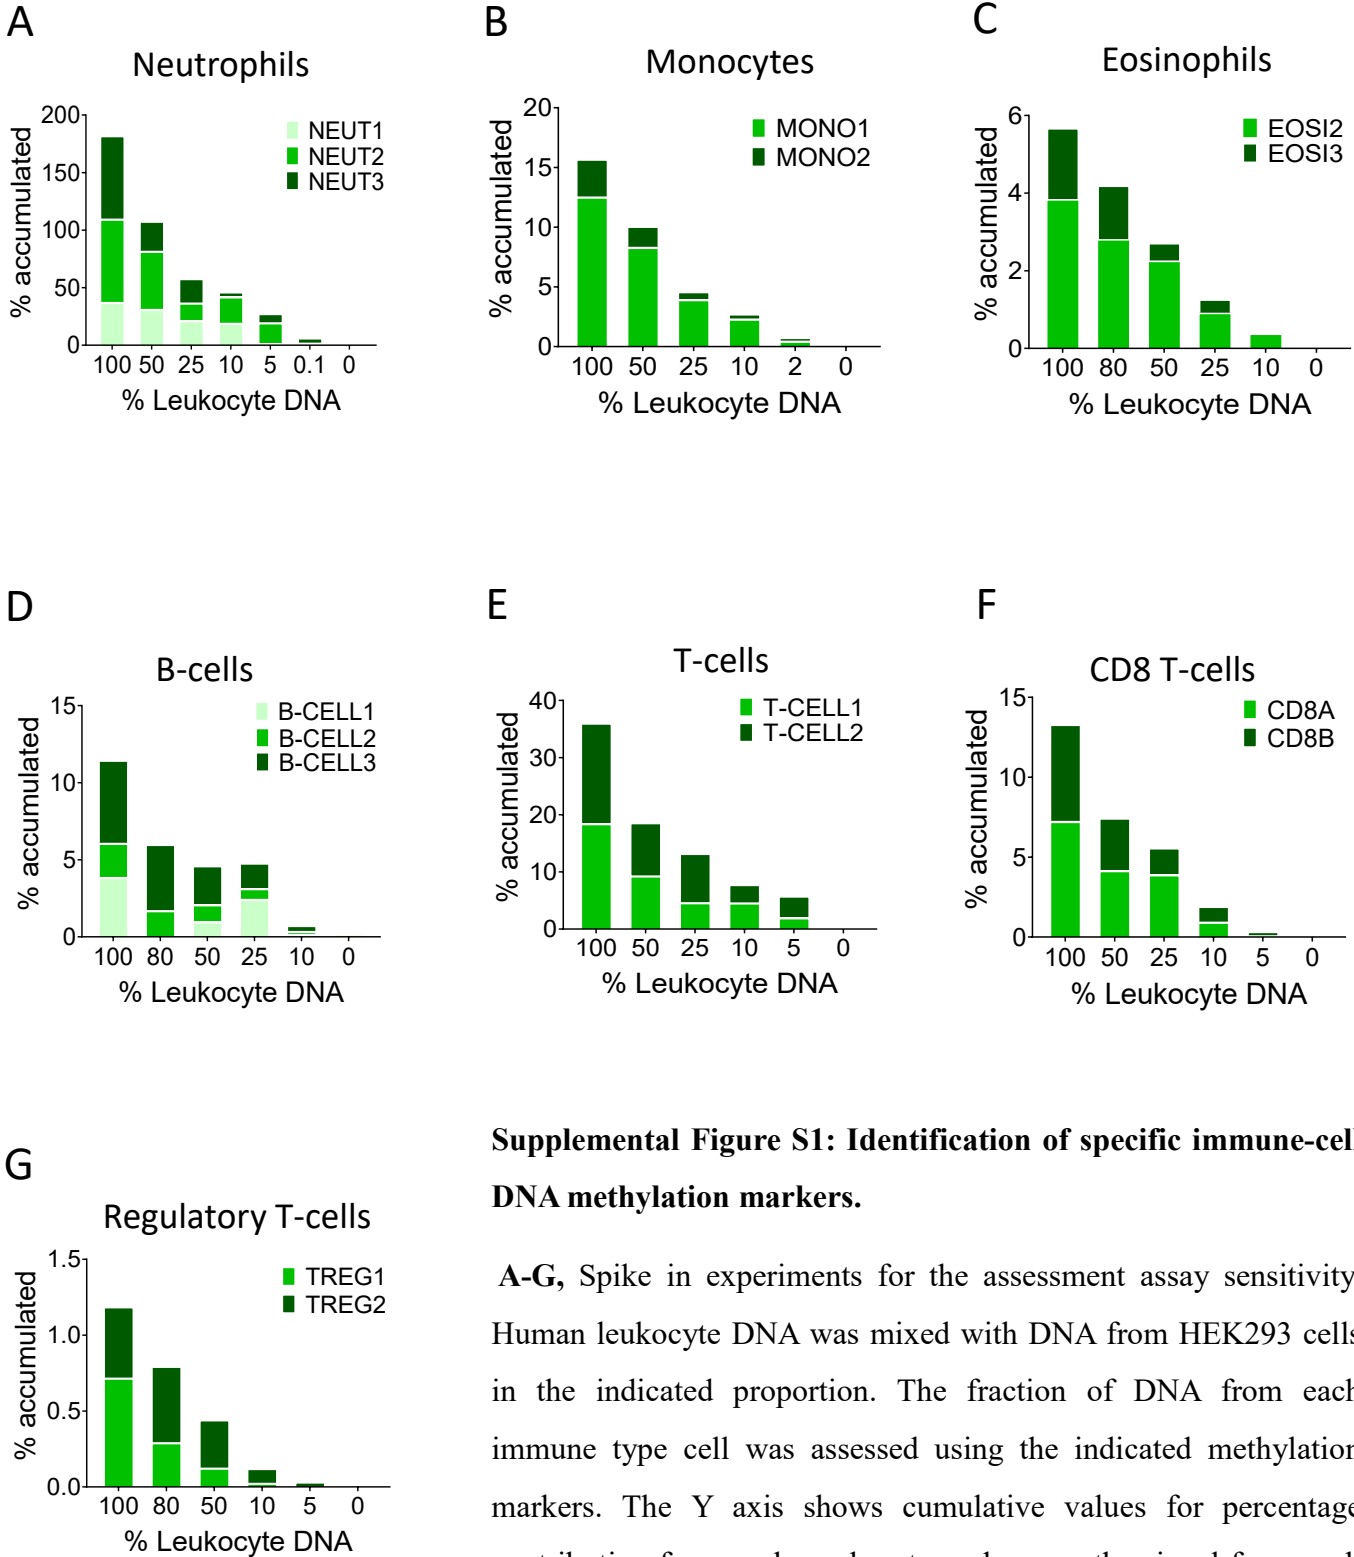

**Supplemental Figure S1: Identification of specific immune-cell DNA methylation markers.**

**A-G,** Spike in experiments for the assessment assay sensitivity. Human leukocyte DNA was mixed with DNA from HEK293 cells in the indicated proportion. The fraction of DNA from each immune type cell was assessed using the indicated methylation markers. The Y axis shows cumulative values for percentage contribution from each marker, to underscore the signal from each individual marker.

# Supplemental Figure S2 (Related to Figure 2)

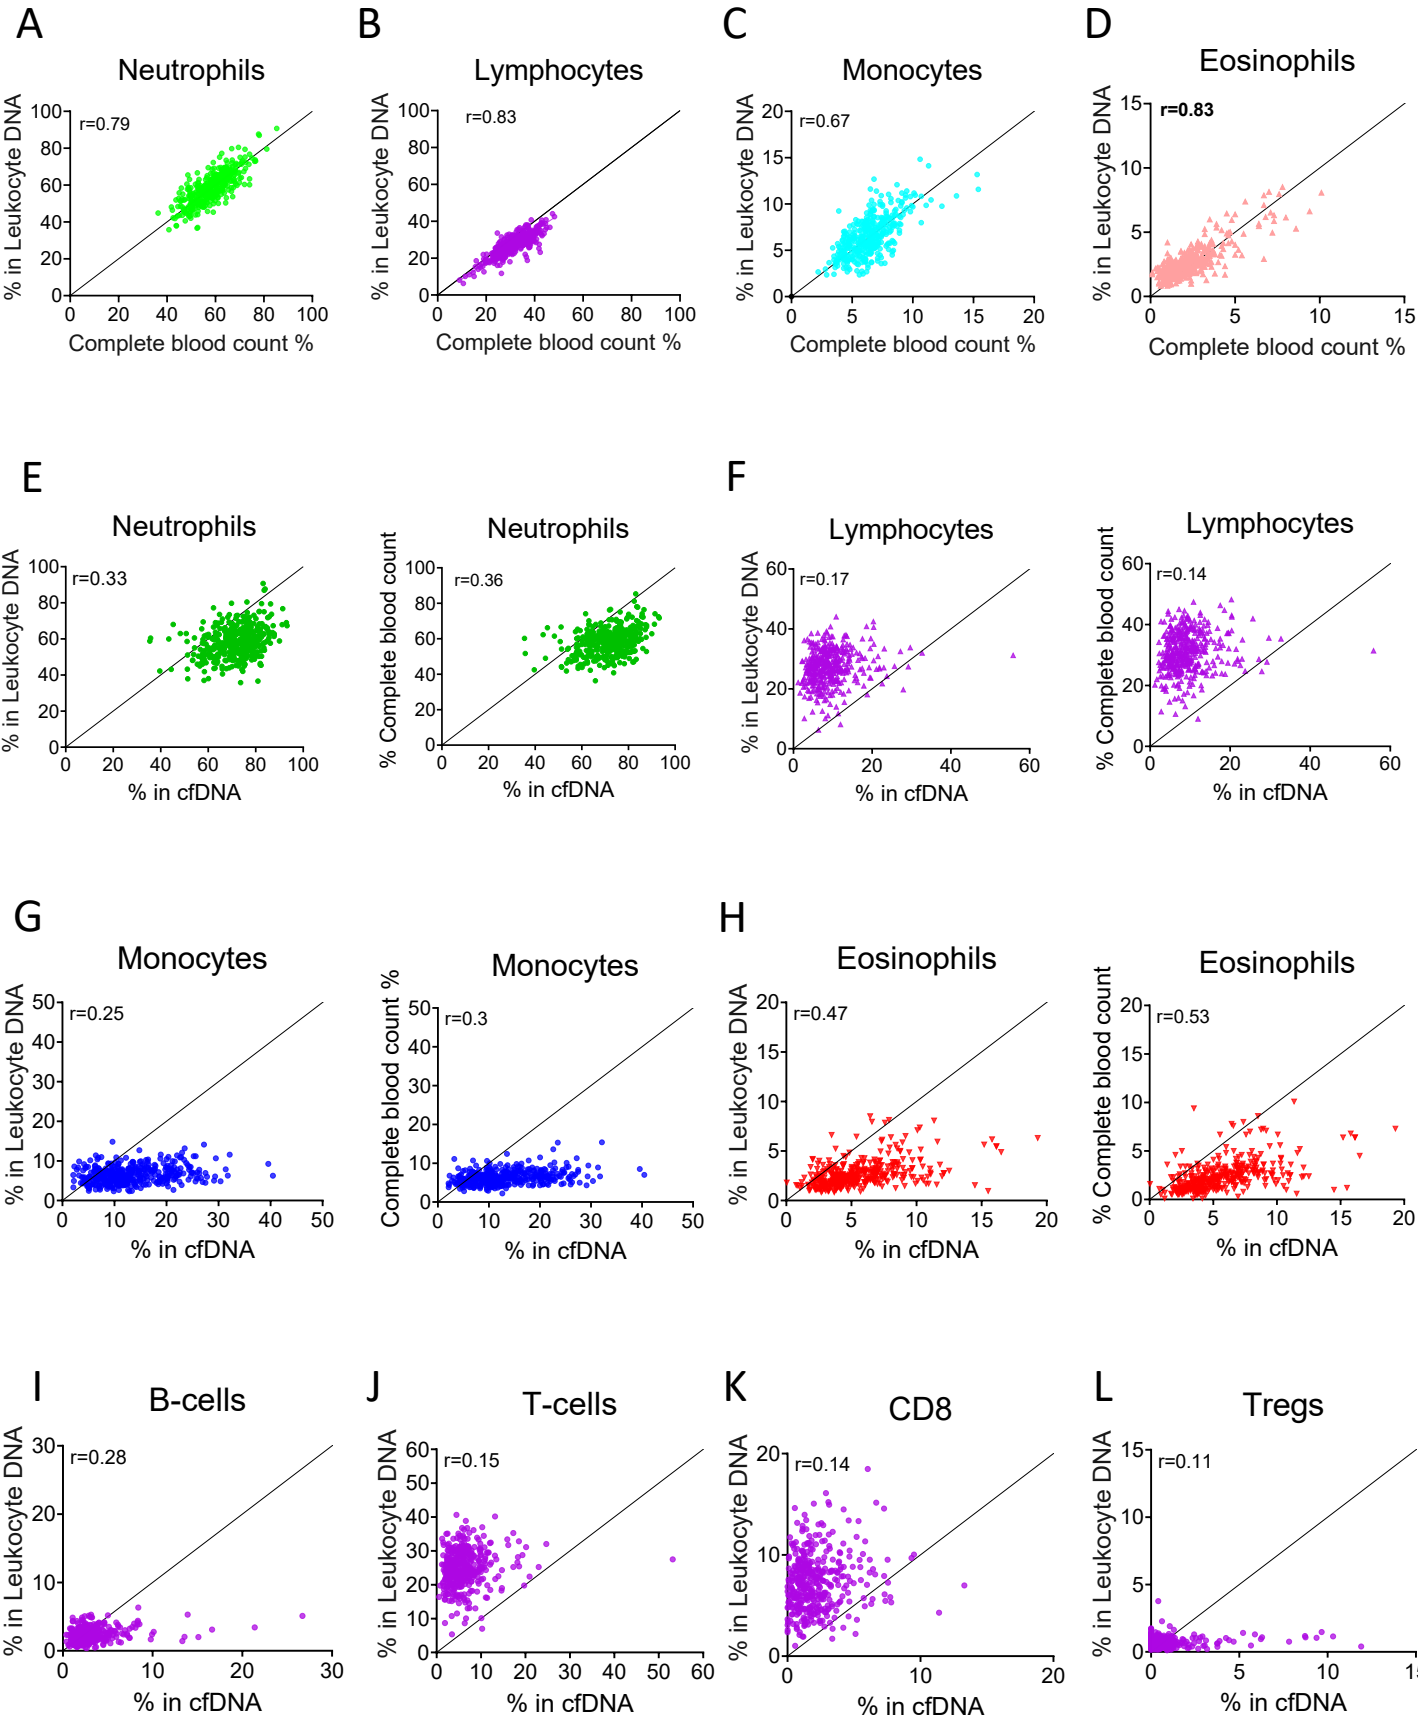

**Supplemental Figure S2: Levels of immune cell-derived cfDNA are not correlated with the counts of these cells in circulation, and reflect cell type-specific turnover rates.**

Plasma and blood samples (n=392) were obtained from 79 healthy individuals that vary in age and gender. Methylation-based immune markers were determined on genomic DNA from whole blood, and on plasma cfDNA. Standard CBC values were also obtained. **A-D**, correlation between CBC and methylation markers in cfDNA. **E-H**, correlation between cfDNA methylation signals and whole blood methylation signals (left graph in each panel) or CBC (right graph in each panel). **I-L**, correlation between cfDNA methylation signals whole blood methylation signals for cell types that are not scored in CBC.



Supplemental Figure S3 (Related to Figure 2)

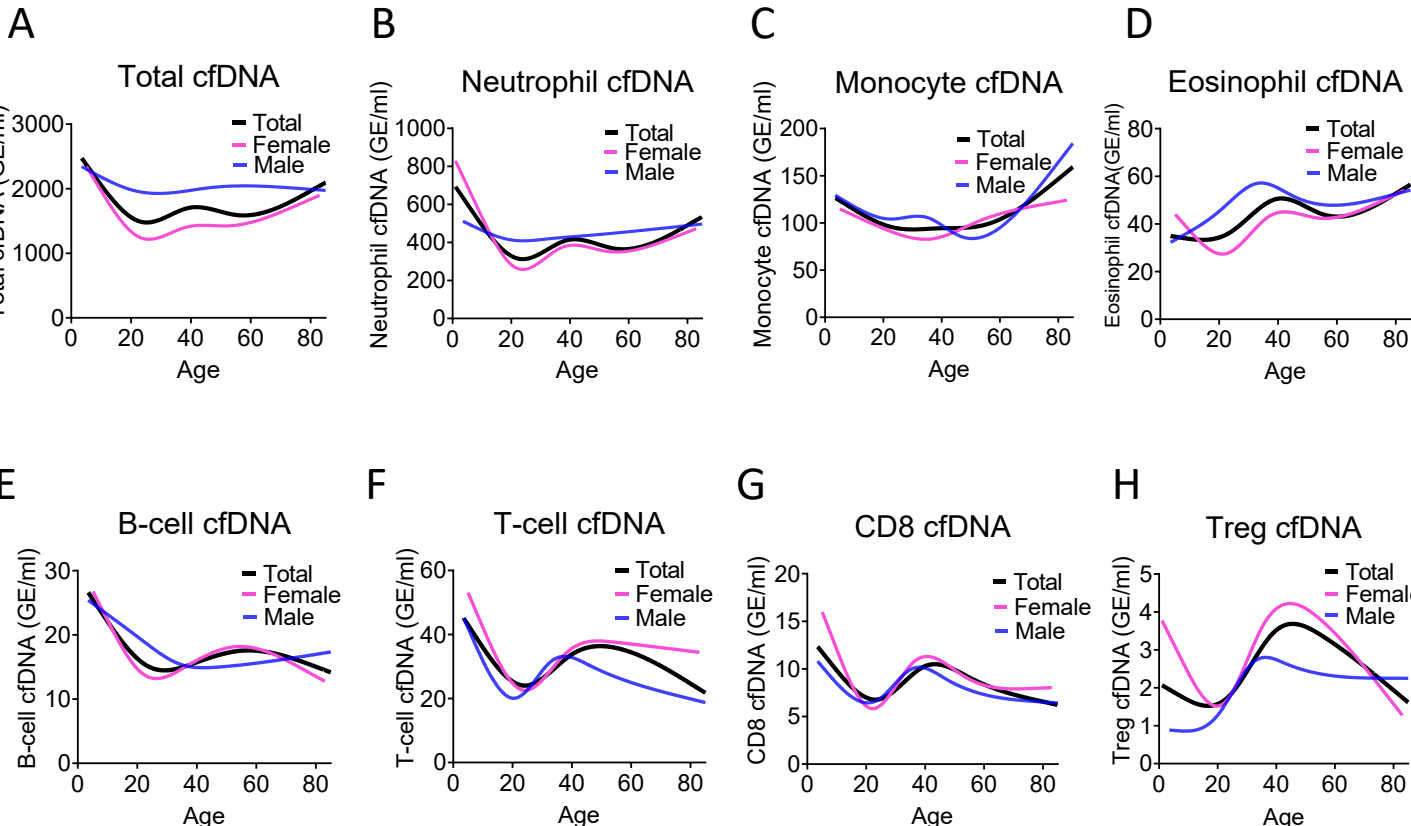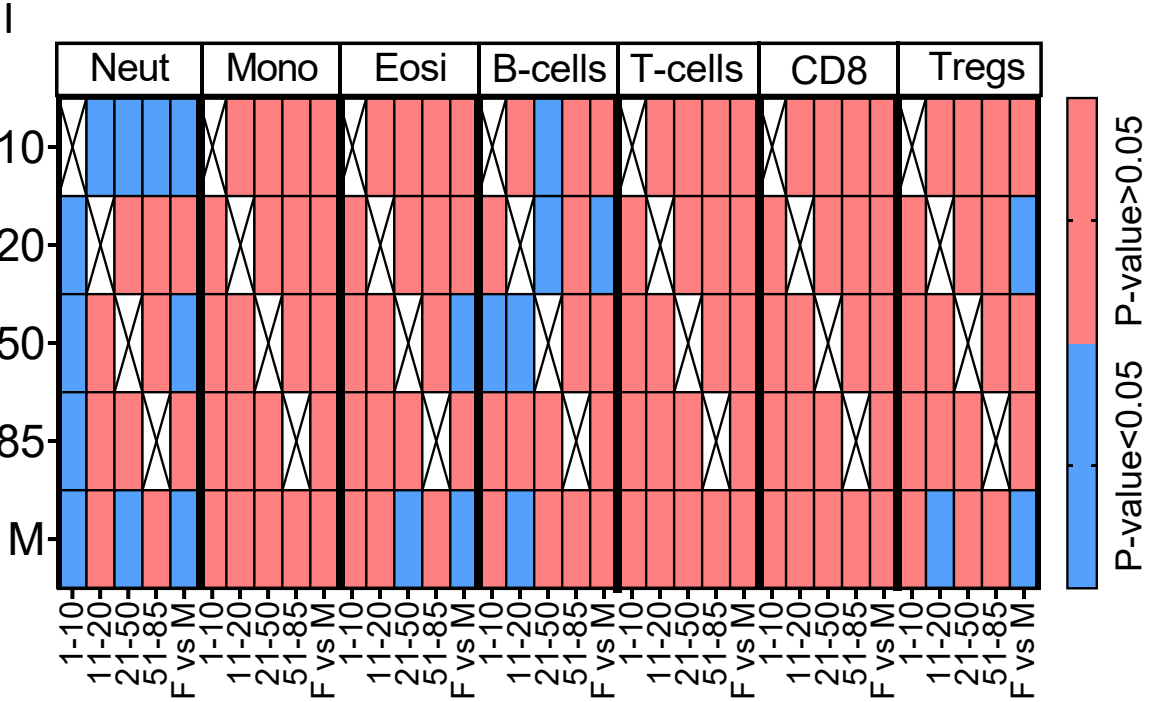

## Supplemental Figure S3 (Related to Figure 2)

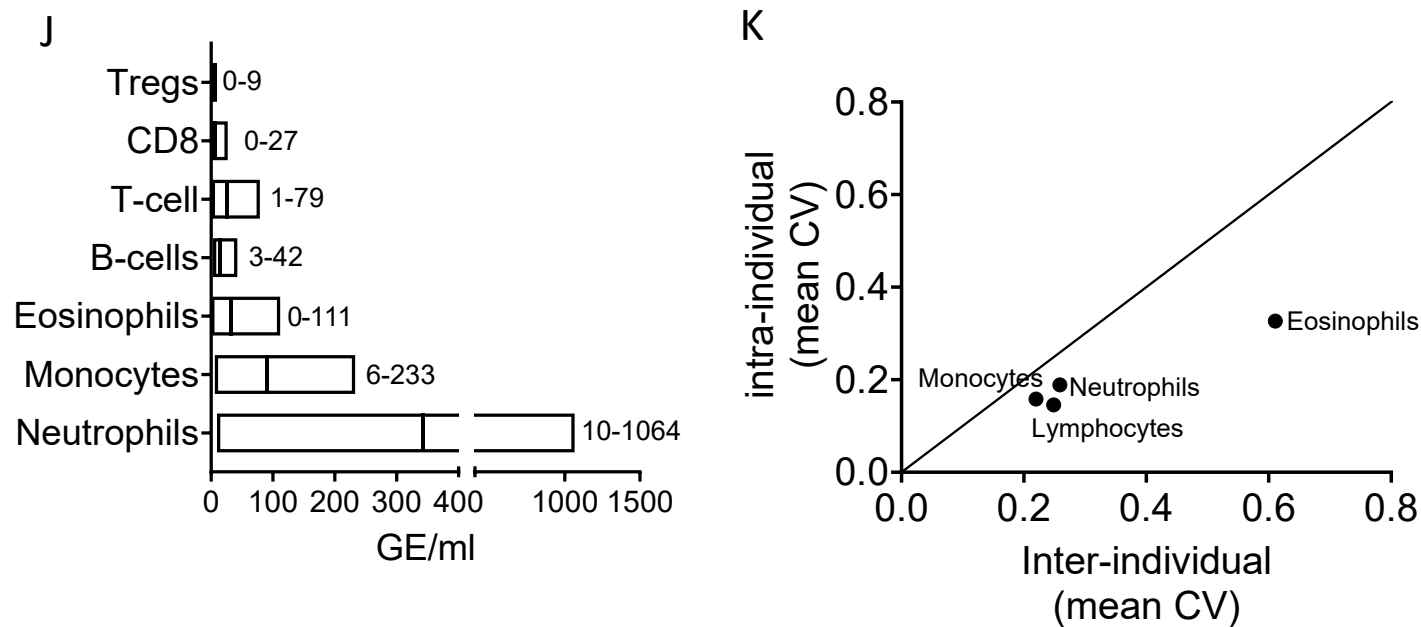

### Supplemental Figure S3: Immune derived cfDNA characterization in a healthy population.

**A-H**, total and immune derived cfDNA was characterized in healthy individuals (n=227) as a spline curve fit showing the trend of the data across different age groups (black line), with a breakdown to gender (female pink lines, male blue lines) for the indicated immune cell types. **I**, a categorical heat-map showing significant (blue, p-value<0.05) and non-significant (red, p-value>0.05, Kruskal-wallis) differences in cfDNA values for each immune cell type across different age groups and between genders. Age groups were 1-10 years (n=21), 11-20 (n=30), 21-50 (n=134), and >50 (n=37). **J**, the normal cfDNA range for each cell type: neutrophils (mean=390, range 10-1064 GE/ml), monocytes (mean=101, range 6-233 GE/ml), eosinophils (Mean=38, range 0-111 GE/ml) T cells (Mean=30, range 1-79) B-cells (mean=17, range 3-42 GE/ml) CD8 T-cells, (mean=8, range 0-27 GE/ml) and Tregs (mean=2, range 0-9 GE/ml) based on samples from 227 individuals excluding outliers using the ROUT outlier test (Q=5%). **K**, XY scatter plot showing the average of inter-individual coefficient of variation (X-axis) and intra-individual coefficient of variation (Y-axis) for the fraction of cells from each immune cell types based on CBC. Black line represents perfect correlation between inter- and intra-individual variation. Dots below the black line represent greater inter-individual variation and dots above represent greater intra-individual variance.

# Supplemental Figure S4 (Related to Figure 3)

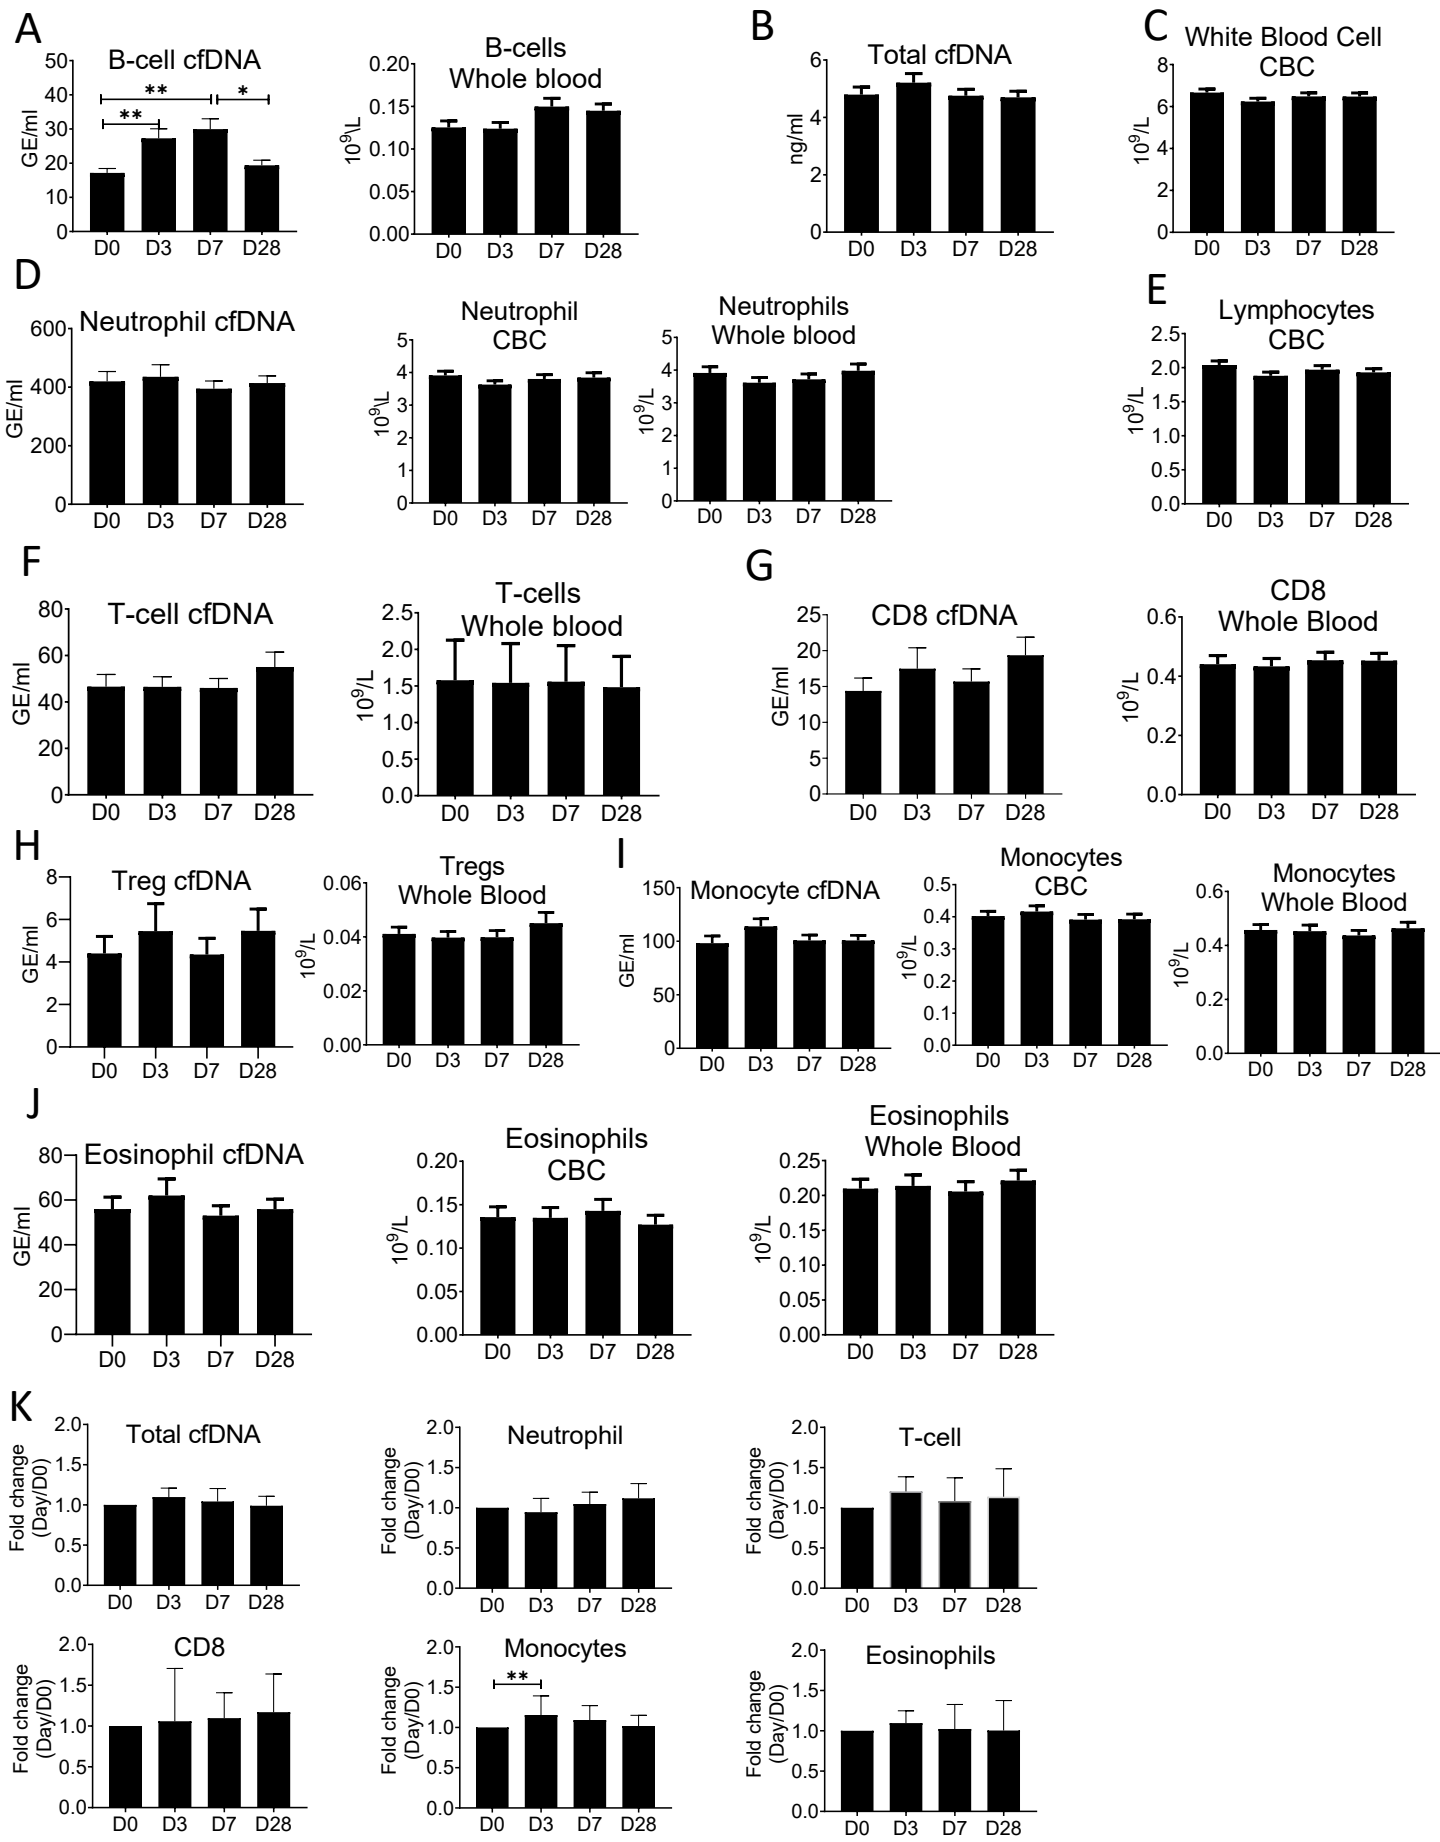

Supplemental Figure S4 (Related to Figure 3)

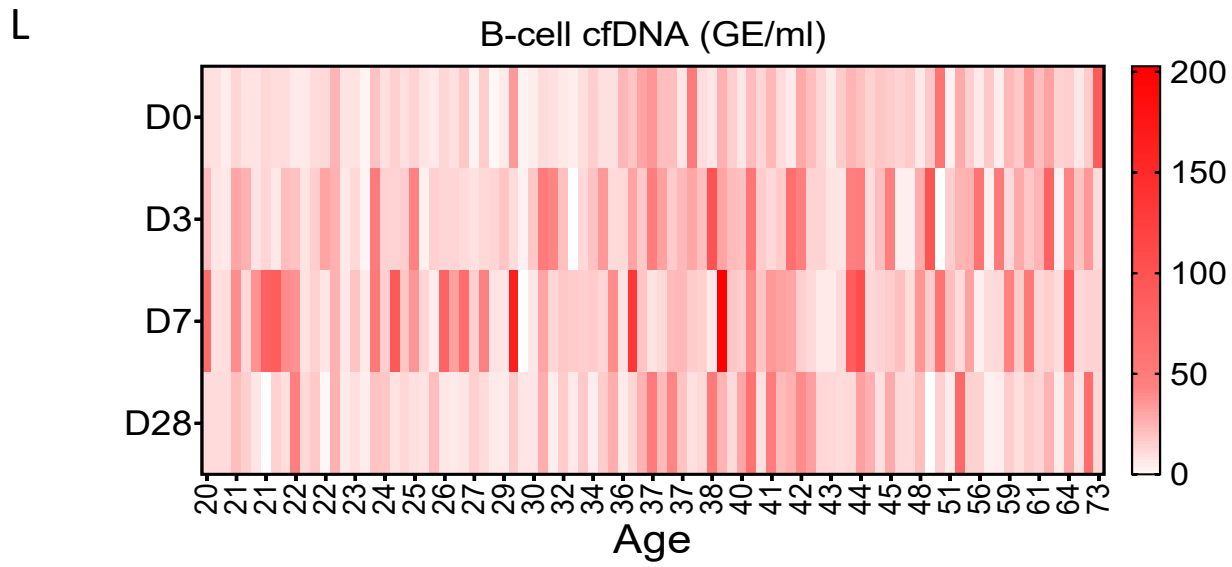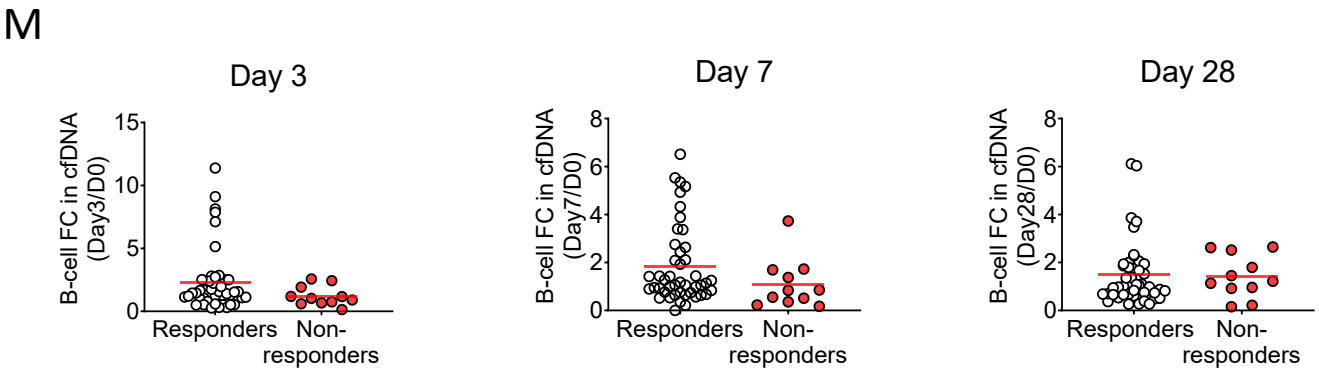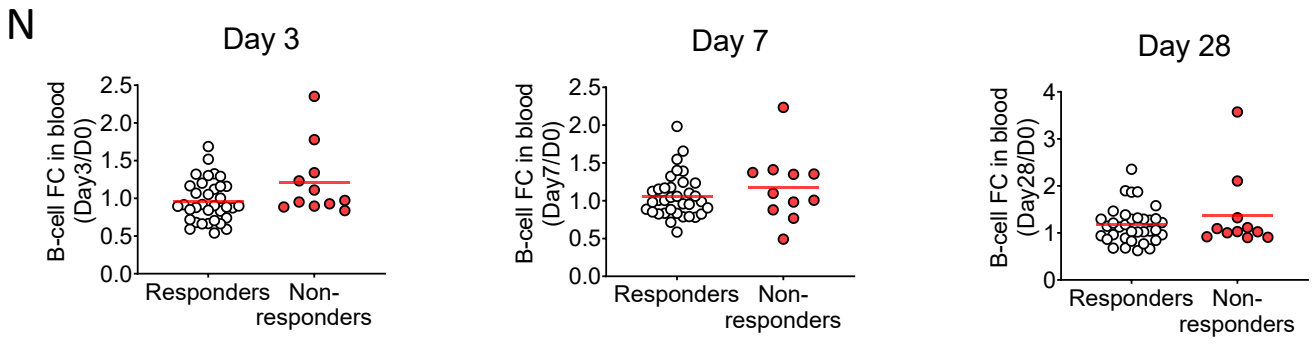

**Supplemental Figure S4: Specific elevation of B-cell derived cfDNA after influenza vaccination, prior to changes in cell counts and in correlation to efficacy of response to vaccination.**

Plasma and blood samples were taken from volunteers (n=92) receiving the annual influenza vaccination. Samples were obtained on the day before vaccination (D0), and at days 3, 7 & 28 (D3, D7, D28). Immune methylation markers were tested on both cfDNA and whole blood. Statistical significance is calculated relative to the levels at D0. **A**, B-cell derived cfDNA markers are elevated on day 3 and day 7 (p-value=0.0002) after influenza vaccination. Circulating B-cell counts did not change significantly at the population level (p-value=0.078). **B**, Total cfDNA (p-value=0.9). **C**, White blood cells count (p-value=0.28). **D**, Neutrophil DNA in plasma (p-value=0.65) and whole blood (p-value=0.53), and neutrophil counts in CBC (p-value=0.47). **E**, Lymphocyte counts in CBC (p-value=0.26). **F**, T-cell DNA in plasma (p-value=0.58) and whole blood (p-value=0.84). **G**, CD8 T-cell DNA in plasma (p-value=0.5) and whole blood (p-value=0.83). **H**, Treg DNA in plasma (p-value=0.78) and whole blood (p-value=0.85). **I**, Monocyte DNA in plasma (p-value=0.22) and whole blood (p-value=0.68), and monocyte counts in CBC (p-value=0.79). **J**, Eosinophil DNA in plasma (p-value=0.76) and whole blood (p-value=0.81), and eosinophil counts in CBC (p-value=0.93). **K**, cfDNA measurements normalized to baseline at D0 of each individual: total cfDNA (p-value=0.37), neutrophil cfDNA (p-value=0.57), T-cell cfDNA (p-value=0.69), CD8 cfDNA (p-value=0.48), monocyte cfDNA (p-value=0.01), and eosinophil cfDNA (p-value=0.88). (Kruskal-wallis). **L**, a heat map showing the level of B-cell cfDNA in each individual following vaccination. **M-N**, normalized B-cell derived cfDNA (**M**) and normalized circulating B-cells (**N**) in responders versus non-responders on days 3, 7 and 28. There are no statistically significant differences between the groups (Mann-Whitney test). Note that when the peak value of B cell cfDNA in blood is considered (at any day after vaccination), responders have a stronger signal, as shown in main Figure 4.

# Supplemental Figure S5 (Related to Figure 4)

**A**

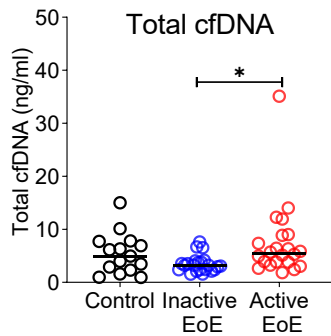

**B**

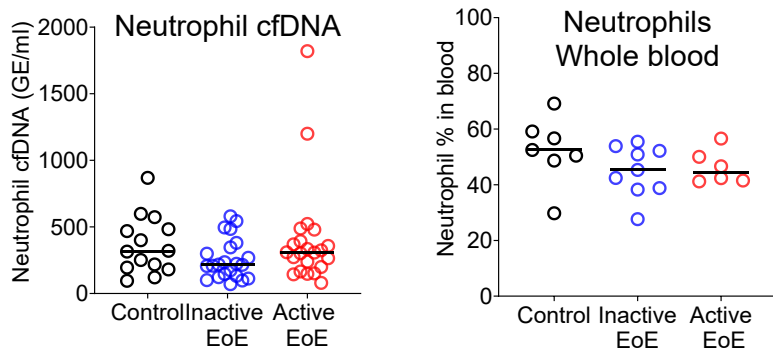

**C**

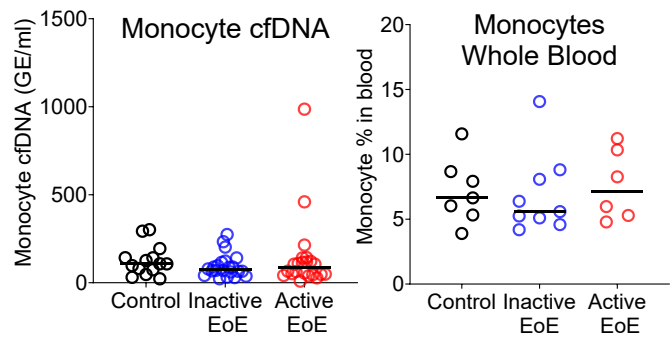

**D**

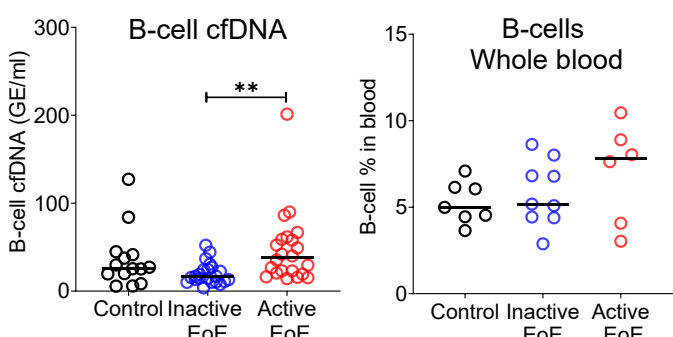

**E**

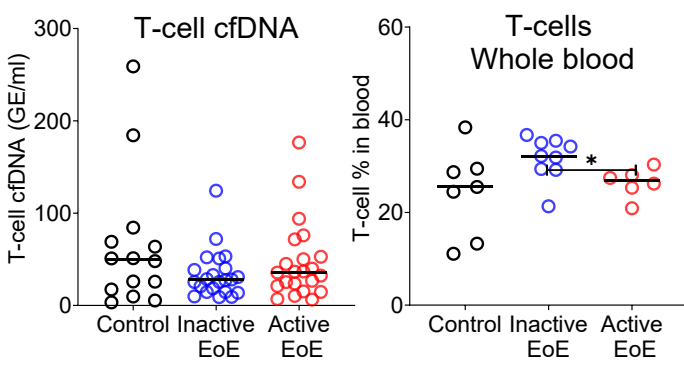

**F**

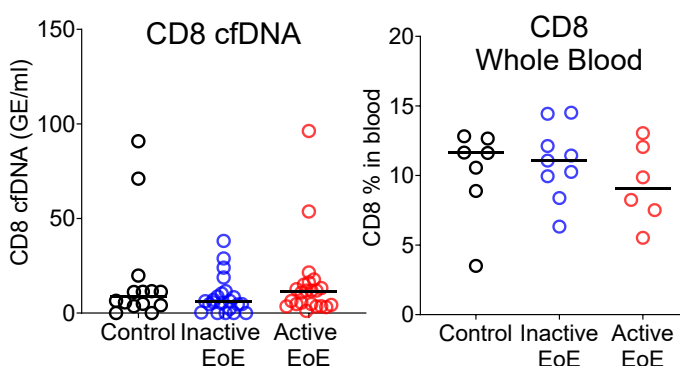

**G**

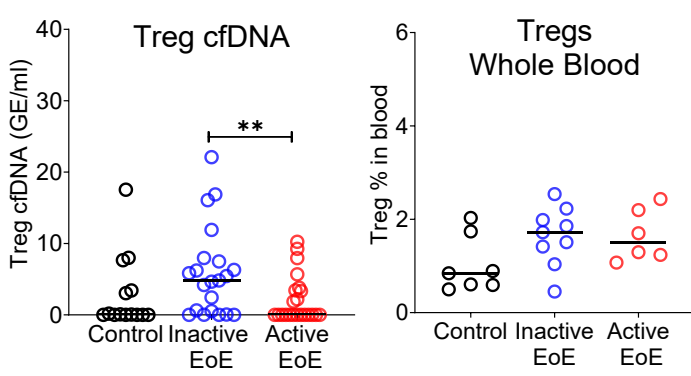

**H**

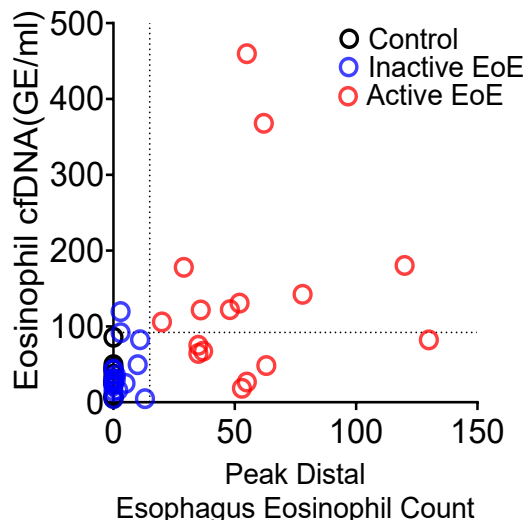

## Supplemental Figure S5: Selective elevation of eosinophil-derived cfDNA in patients with Eosinophilic Esophagitis.

Plasma was collected from three groups: healthy controls (n=14), inactive EoE (n=24), and active EoE (n=21). Some of the patients had also PBMCs collected: healthy controls (n=7), inactive EoE (n=9), and active EoE (n=6). **A**, Total cfDNA levels were significantly higher in active EoE compared to inactive EoE (p-value=0.01). **B**, neutrophil derived cfDNA (p-value=0.19) and neutrophil DNA in whole blood (p-value=0.23) are not different in EoE. **C**, monocyte cfDNA (p-value=0.45) and monocytes DNA in whole blood are not different in EoE (p-value=0.75). **D**, B-cell derived cfDNA is significantly higher in active EoE compared with inactive EoE (p-value=0.0021), but B-cell DNA in whole blood is not significantly different in EoE (p-value=0.47). **E**, T-cell derived cfDNA is not significantly different between the groups (p-value=0.48). However the fraction of T-cell DNA in whole blood is significantly higher in inactive EoE compared with active EoE (p-value=0.0454). **F**, there is no significant difference in CD8 derived cfDNA (p-value=0.4) and in CD8-derived DNA in whole blood among EoE patients (p-value=0.6). **G**, Treg cfDNA levels are significantly higher in inactive EoE compared with active EoE (p-value=0.009) while Treg DNA in whole blood is not different between patients and controls (p-value=0.15, Kruskal-Wallis test). **H**, XY Scatter plot for Eosinophil derived cfDNA levels versus Peak distal Esophagus Eosinophil count, in healthy controls and in patients with inactive or active EoE. Dashed lines indicate thresholds for negative and positive Peak distal Esophagus Eosinophil count (HPF), and negative and positive Eosinophil cfDNA.

# Supplemental Figure S6 (Related to Figure 5)

**A**

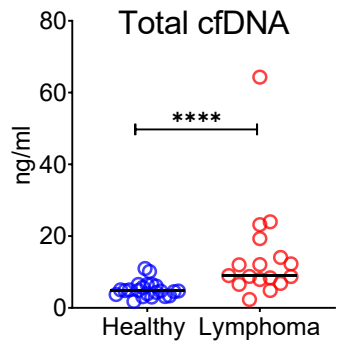

**B**

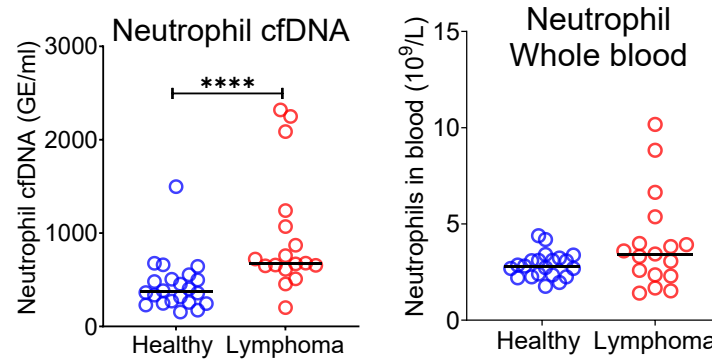

**C**

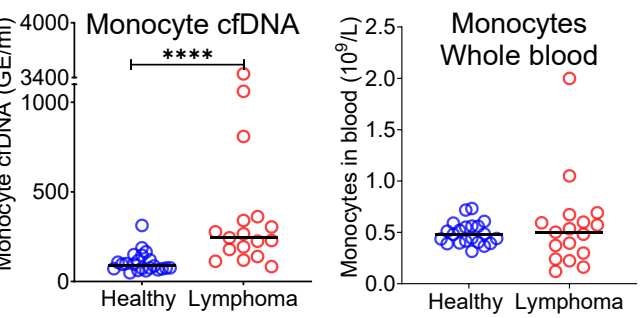

**D**

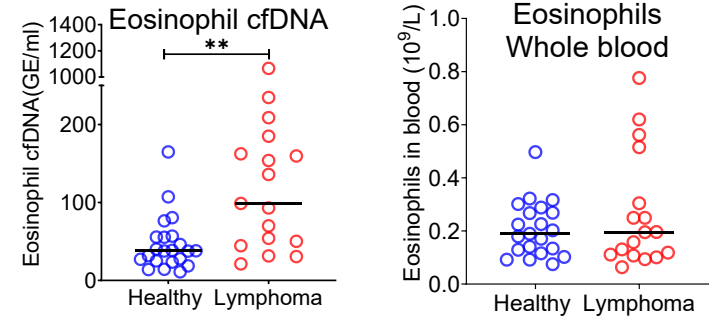

**E**

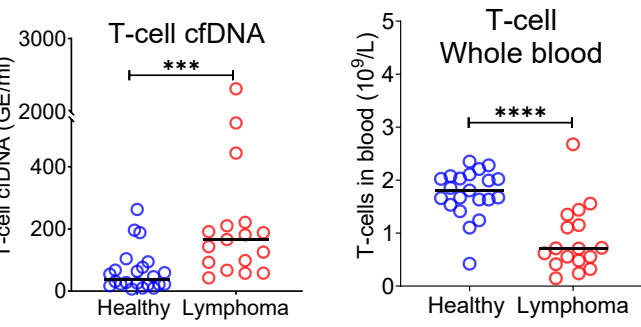

**F**

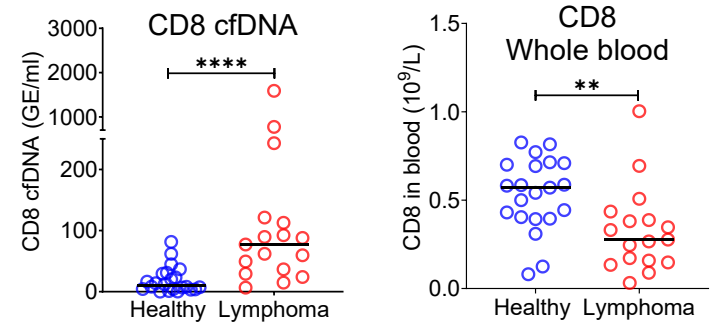

**G**

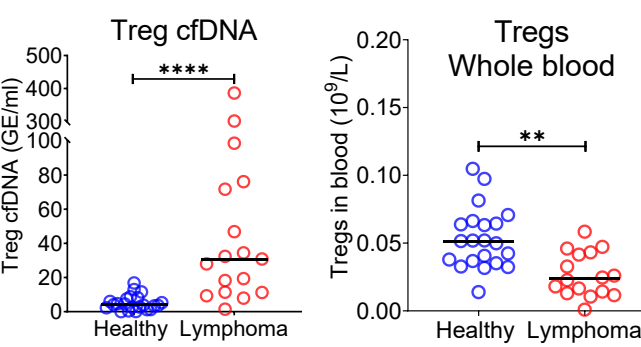



### Supplemental Figure S6: Immune derived cfDNA in lymphoma patients.

Plasma and blood were collected from healthy controls (n=22) and patients with lymphoma (n=17). **A**, Total cfDNA levels are significantly higher in lymphoma patients compared with healthy controls (p-value<0.0001 Mann–Whitney test). **B**, neutrophil-derived cfDNA levels are higher in lymphoma patients compared with controls (p-value<0.0001), but neutrophil DNA levels in whole blood are not different between patients and controls (p-value=0.17). **C**, monocyte-derived cfDNA levels are elevated in lymphoma patients (p-value<0.0001), but monocyte DNA levels in whole blood are not different between patients and controls (p-value=0.95). **D**, eosinophil-derived cfDNA are elevated in lymphoma patients (p-value<0.0019) but eosinophil DNA in whole blood is not elevated (p-value=0.86). **E**, T-cell derived cfDNA levels are elevated in lymphoma (p-value=0.003) while T-cell DNA is reduced in whole blood (p-value<0.0001). **F**, CD8 T-cell derived cfDNA levels are elevated in lymphoma (p-value<0.0001) while CD8 T-cell DNA is reduced in whole blood (p-value=0.003). **G**, Treg-derived cfDNA levels are elevated in lymphoma patients (p-value<0.0001) while Treg DNA in whole blood is reduced (p-value=0.0026, Mann–Whitney test).



# Supplemental Figure S7 (Related to Figure 5)

## G

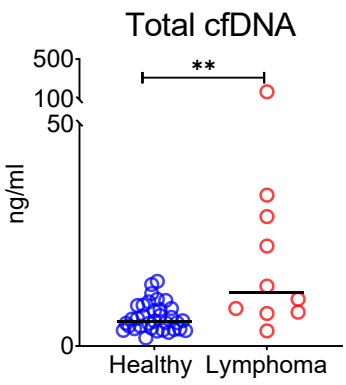

## H

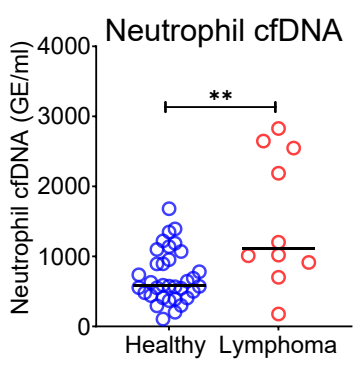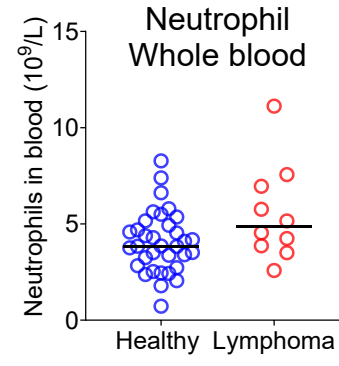

## I

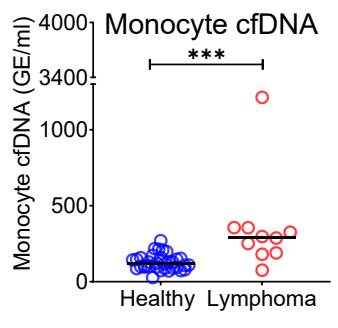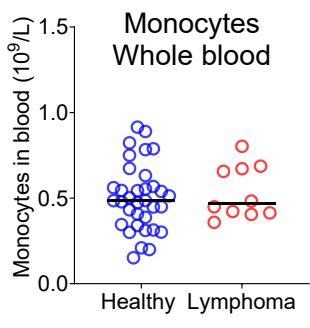

## J

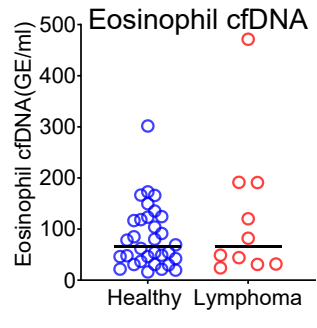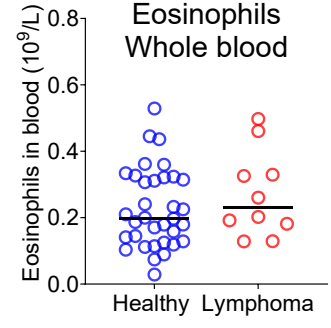

## K

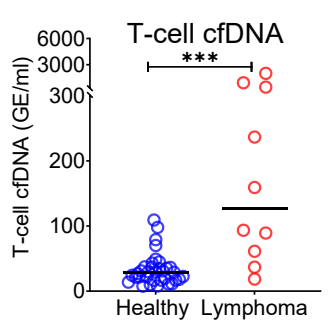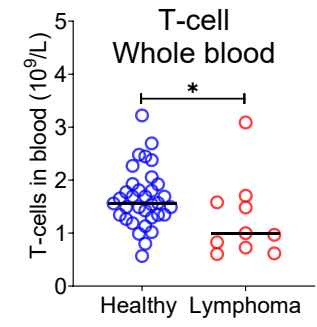

## L

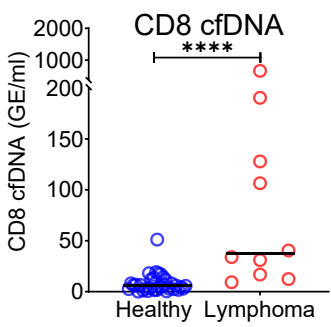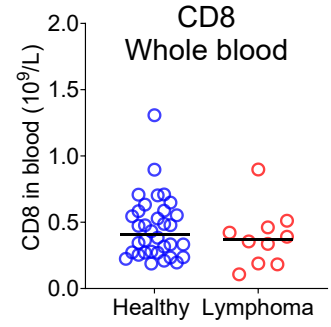

## M

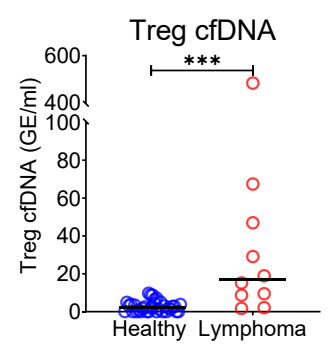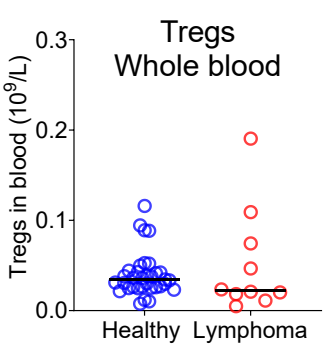

## Supplemental Figure S7: cfDNA analysis of a second cohort of lymphoma patients.

Blood was collected from a 2nd cohort of donors including 34 healthy controls and 10 patients with lymphoma.

**A**, B-cell counts (p-value=0.03, Mann-Whitney). **B**, XY Scatter plot for B-cell derived cfDNA levels versus B-cell absolute counts. Dashed lines indicate healthy baseline levels of B-cell absolute counts and B-cell cfDNA. **C**, ROC curve for the diagnosis of lymphoma based on B-cell cfDNA levels in healthy subjects and patients with B cell lymphoma. **D**, ROC curve for diagnosis of lymphoma based on B-cell counts. **E**, immune cell type-specific cfDNA in lymphoma patients and healthy controls (mean lymphoma/mean control). **F**, the ratio between the percentage of cfDNA from a given immune cell type and the percentage of cells from this population in blood according to CBC, in each donor of the 2nd cohort (healthy blue bars; lymphoma red bars). Boxes represent 25th and 75th percentiles around the median, whiskers span min to max. **G**, Total cfDNA levels are significantly higher in lymphoma patients compared with healthy controls (p-value=0.0027 Mann-Whitney test). **H**, neutrophil-derived cfDNA levels are higher in lymphoma patients compared with controls (p-value=0.0067), but neutrophil DNA levels in whole blood are not different between patients and controls (p-value=0.07). **I**, monocyte-derived cfDNA levels are elevated in lymphoma patients (p-value=0.001), but monocyte DNA levels in whole blood are not different between patients and controls (p-value=0.71). **J**, eosinophil-derived cfDNA and whole blood are not significantly higher in lymphoma patient's vs healthy controls (p-value=0.63; p-value=0.28). **K**, T-cell derived cfDNA levels are elevated in lymphoma (p-value=0.0001) while T-cell DNA is reduced in whole blood (p-value=0.036). **L**, CD8 T-cell derived cfDNA levels are elevated in lymphoma (p-value<0.0001) while CD8 T-cell DNA in whole blood is not different between patients and controls (p-value=0.37). **M**, Treg-derived cfDNA levels are elevated in lymphoma patients (p-value=0.0001) while Treg DNA is not significantly different in whole blood (p-value=0.41, Mann-Whitney test).
